# Neuronal activity remodels the F-actin based submembrane lattice in dendrites but not axons of hippocampal neurons

Flavie Lavoie-Cardinal<sup>1,2,\*</sup>, Anthony Bilodeau<sup>1</sup>, Mado Lemieux<sup>1</sup>, Marc-André Gardner<sup>3</sup>, Theresa Wiesner<sup>1</sup>, Gabrielle Laramée<sup>1</sup>, Christian Gagné<sup>3</sup>, and Paul De Koninck<sup>1,4,\*</sup>

<sup>1</sup>CERVO Brain research center, 2601 de la Canardière, Québec (QC), G1J 2G3, Canada

<sup>2</sup>Department of psychiatry and neuroscience, Laval University, Québec (QC), G1V 0A6, Canada

<sup>3</sup>Department of electrical and computer engineering, Laval University, Québec (QC), G1V 0A6, Canada

<sup>4</sup>Department of biochemistry, microbiology, and bioinformatics, Laval University, Québec (QC), G1V 0A6, Canada

\* corresponding authors: [Paul.DeKoninck@neurosciences.ulaval.ca](mailto:Paul.DeKoninck@neurosciences.ulaval.ca),  
[flavie.lavoie-cardinal@cervo.ulaval.ca](mailto:flavie.lavoie-cardinal@cervo.ulaval.ca)

## Abstract

The nanoscale organization of the F-actin cytoskeleton in neurons comprises membrane-associated periodical rings, bundles, and longitudinal fibers. The F-actin rings have been observed predominantly in axons but only sporadically in dendrites, where fluorescence nanoscopy reveals various patterns of F-actin arranged in mixed patches. These complex dendritic F-actin patterns pose a challenge for investigating quantitatively their regulatory mechanisms. We developed here a weakly supervised deep learning segmentation approach of fluorescence nanoscopy images of F-actin in cultured hippocampal neurons. This approach enabled the quantitative assessment of F-actin remodeling, revealing the disappearance of the rings during neuronal activity in dendrites, but not in axons. The dendritic F-actin cytoskeleton of activated neurons remodeled into longitudinal fibers. We show that this activity-dependent remodeling involves  $\text{Ca}^{2+}$  and NMDA-dependent mechanisms. This highly dynamic restructuring of dendritic F-actin based submembrane lattice into longitudinal fibers may serve to support activity-dependent membrane remodeling, protein trafficking and neuronal plasticity.

## Introduction

One of the hallmark discoveries made possible by fluorescence nanoscopy methods is the existence of a periodical lattice of F-actin, spectrin, and associated proteins under the surface membrane of neuronal processes. This lattice, containing F-actin rings periodically spaced 180-190nm apart, was initially discovered in axons [1]. The lattice was later observed in dendrites of multiple types of neurons, albeit to a lesser extent compared to axons [2–4]. Several isoforms of spectrin have been observed in the lattice, with variable prevalence in axons compared to dendrites and during development [3, 4]. In addition to forming periodical rings, other F-actin structures have been described at the nanoscale in axons and dendritic shaft, including longitudinal fibers [2, 5–7].

The role and regulatory mechanisms of the periodical submembrane skeletal structure remain unclear. It has been shown to be regulated during development in axons, dendrites, and dendritic spines [2–4, 8]. It was

25 demonstrated that the submembrane lattice destabilization triggers axonal degeneration [9, 10]. A recent  
26 study provided evidence that it serves as a signaling platform for receptor tyrosine kinase transactivation in  
27 neurons [11].

28 The more variable appearance and sporadic presence of the F-actin/spectrin lattice in dendrites compared  
29 to axons suggests that the structure is differently regulated in these distinct processes [2–4, 12]. A clear  
30 discrimination between spatially overlapping axons and dendrites, using a combination of specific markers,  
31 has been lacking in studies comparing the properties of the lattice, which may have impacted the analyses  
32 of its prevalence in dendrites. Furthermore, the greater diversity of F-actin nanostructures in dendrites  
33 compared to axons poses an additional challenge for quantitative analysis of the submembrane lattice. Several  
34 features of neuronal culture conditions, age, or fixation methods may have also contributed to discrepancies  
35 across studies of the dendritic lattice. One feature that has not been controlled or assessed is the level of  
36 electrical or synaptic activity. Ample evidence has shown, using conventional microscopy methods, that  
37 neuronal activity regulates the F-actin cytoskeleton [13, 14].

38 We thus set out to test whether neuronal activity regulates the F-actin-based lattice in dendrites and  
39 axons of cultured hippocampal neurons, using STimulated Emission Depletion (STED) nanoscopy. The  
40 complexity of the nanoscale F-actin patterns in dendrites and axons required the use of image segmentation  
41 to quantify their dynamics. The high diversity and variability of the reported F-actin patterns [1, 2, 4, 6, 8]  
42 prompted a high throughput analysis framework for the detection of those patterns on nanoscopy images.  
43 Recently, deep learning methods have been developed for automated feature detection in microscopy images  
44 from cells [15–19]. We show here that, using a weakly supervised deep learning approach [20–22], we could  
45 train a modified U-Net architecture [15] to segment regions containing fluorescent F-actin rings and/or  
46 longitudinal fibers in axons and dendrites. We demonstrate that this can be done without a significant  
47 decrease in segmentation quality, even in the presence of incomplete or coarse labeling. Our quantitative  
48 analysis highlights the profound diversity of F-actin patterns in dendrites, revealing an activity-dependent  
49 remodeling, from a lattice pattern to longitudinal fibers, which does not occur in axons, involving the influx  
50 of  $\text{Ca}^{2+}$ . The activity-dependent remodeling of F-actin structures in dendrites may explain the previous  
51 sporadic observations of the submembrane F-actin lattice in dendrites and may be necessary to regulate  
52 membrane dynamics and protein transport required for dendritic signaling and plasticity.

## 53 Results

### 54 Activity-dependent remodelling of dendritic but not axonal F-actin 55 nanostructures

56 To resolve the nanoscale organization of the F-actin cytoskeleton in neurons, we used the F-actin fluorescent  
57 marker phalloidin-STAR635, in low density cultured rat hippocampal neurons (8 and 13 DIV), imaged with  
58 STED nanoscopy. We observed complex and diverse patterns of fluorescence inside the neuronal processes  
59 that were only distinguishable with super-resolution microscopy (Fig. 1). The F-actin periodical ring patterns  
60 were robustly detectable in axons (co-labelled with axonal marker SMI31 antibody, detecting phosphorylated  
61 neurofilaments, enriched in axons [23])(Fig. 1). By contrast, dendrites (co-labelled with dendritic marker  
62 MAP2 antibody) exhibited patches of i) F-actin rings perpendicular to the shaft, mixed with patches of what  
63 appeared as either ii) unstructured patterns of F-actin, iii) compact assemblies of F-actin, or iv) longitudinal  
64 fibers parallel to the shaft axis (Fig. 1) [2, 6, 8]. We also observed a polygonal-like (2D) F-actin lattice  
65 in somatic regions, as previously described [4] (Supplementary Fig. 1a). These results confirm previous  
66 work illustrating the difference in the patterns of F-actin labelling in axons and dendrites [2–4]. They  
67 also highlight the frequent spatial overlap of axons and dendrites in cultures, revealing clear axonal lattice  
68 patterns overlaying dendrites (Fig. 1 orange arrowheads). Hence the triple staining (F-actin, dendrites,  
69 axons) is necessary to investigate the regulation of the lattice in both compartments.

70 To investigate the dynamics of the submembrane lattice in axons and dendrites, via the monitoring of  
71 F-actin patterns, we considered a number of labeling strategies that were previously exploited for F-actin  
72 imaging at the nanoscale. These include photoactivatable green fluorescent protein (GFP), Lifeact, and

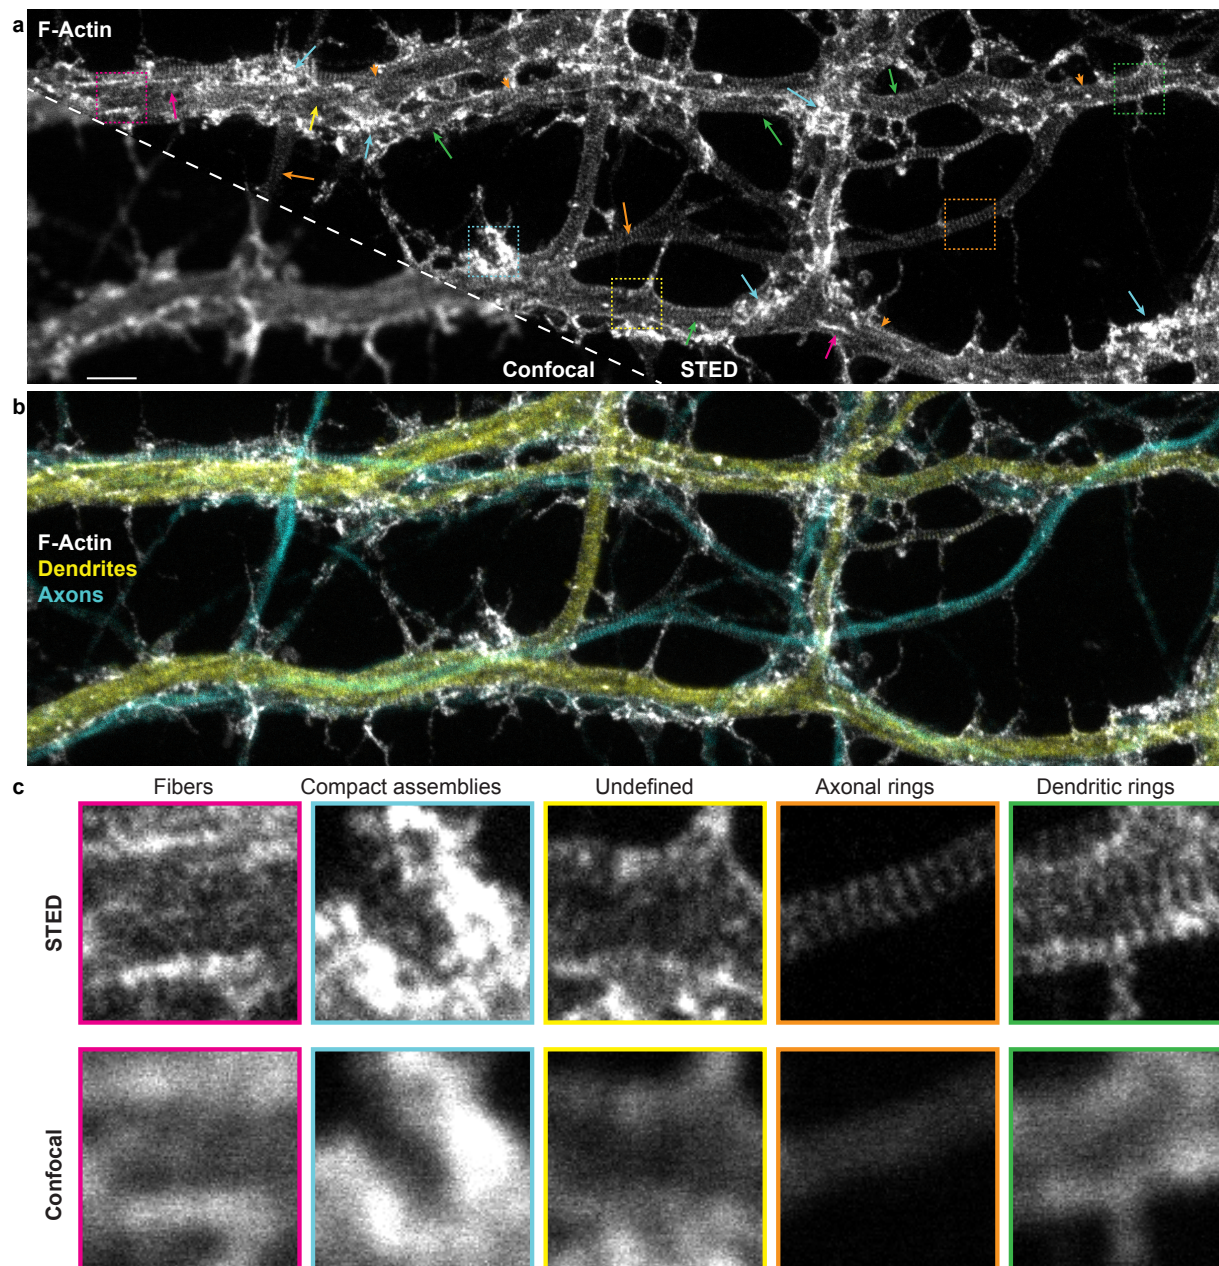

Figure 1: STED nanoscopy reveals diverse nanostructures of F-actin, in cultured hippocampal neuronal processes, that cannot be resolved with confocal microscopy. a) Representative image of the F-actin skeleton showing the diversity of nanostructures that can be observed with STED nanoscopy. Arrows point to regions exhibiting dendritic rings (green), axonal rings (orange), longitudinal fibers (magenta), compact assemblies (cyan), or undefined or diffuse signal (yellow). Orange arrowheads indicate regions of overlapping axonal and dendritic patterns. b) Three color imaging of the region in a) showing the overlap between axons (cyan, phosphorylated neurofilaments - SMI31) and dendrites (yellow, MAP2). MAP2 and SMI31 were imaged with confocal resolution to highlight the shape of the processes. c) Insets show a magnification of the regions indicated with the dashed squares in a) for both STED (top) and confocal (bottom) imaging modalities. Scale bar  $2 \mu\text{m}$ , insets  $3.2 \times 3.2 \mu\text{m}$ .

73 Actin-Chromobody. However, these labels were shown not to reveal the F-actin periodical ring structure [24–

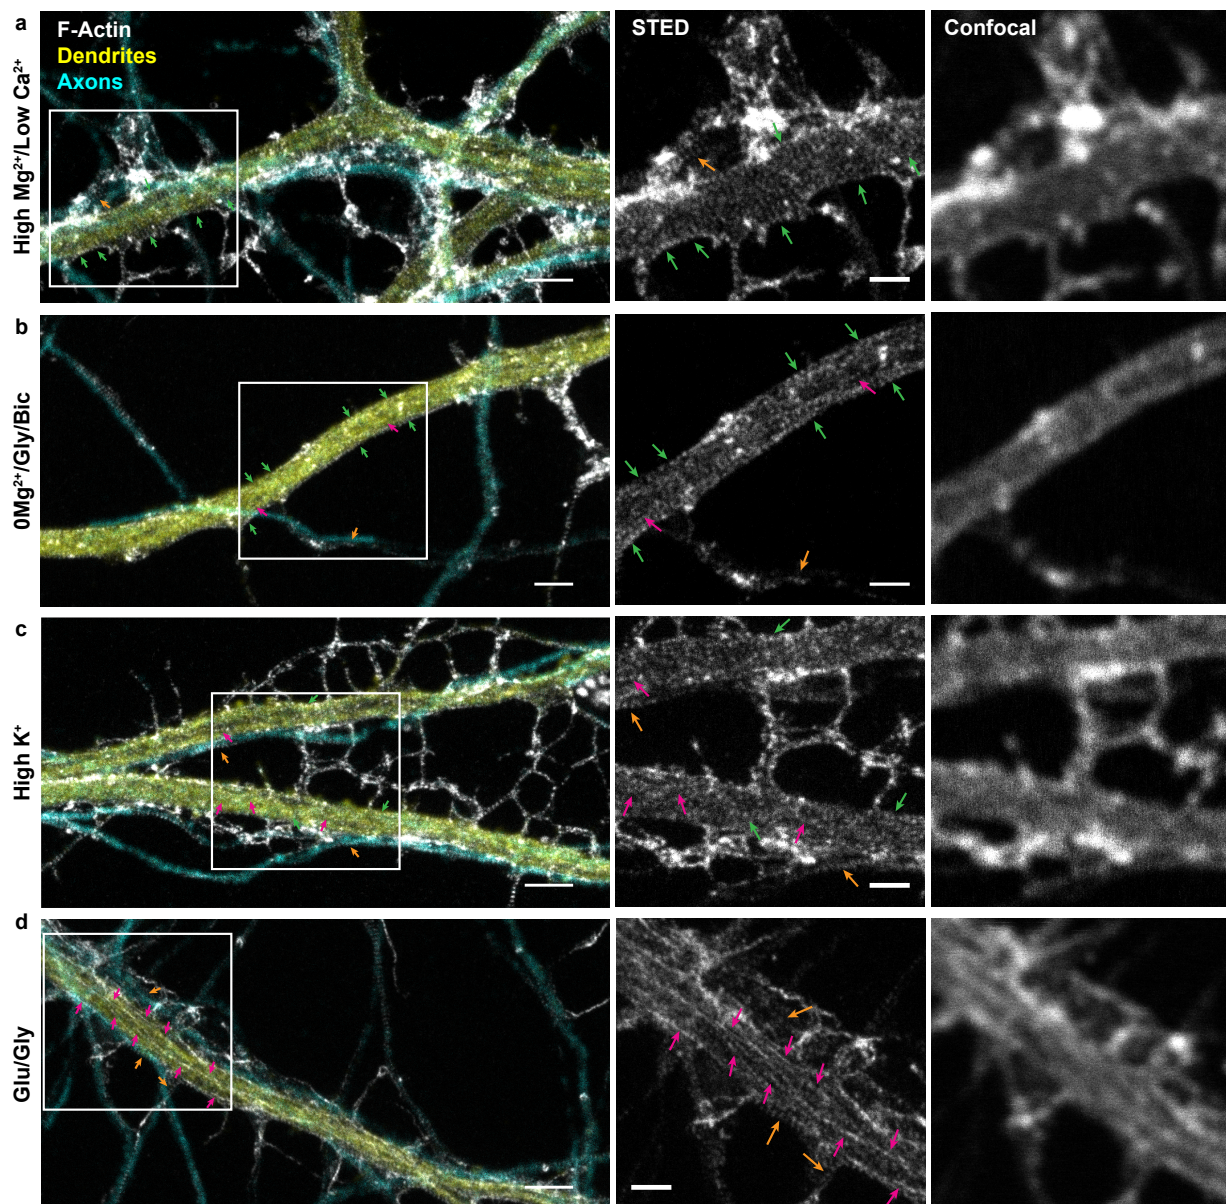

Figure 2: Nanoscale activity-dependent remodelling of F-actin revealed by STED nanoscopy. Three color imaging of F-actin (STED, white), phosphorylated neurofilaments (confocal, cyan) and MAP2 (confocal, yellow) was performed to identify F-actin nanostructures in dendrites (yellow) and axons (cyan). STED imaging shows that the prevalence of dendritic rings (green arrows) and longitudinal fibers (magenta arrows) is modulated by neuronal activity, while axonal rings (orange arrows) are observed regardless of the activity level. Shown are example images for a) the activity-reducing stimuli high  $Mg^{2+}$ /low  $Ca^{2+}$  and the three activity-promoting stimuli b)  $0Mg^{2+}$ /glycine/bicuculline ( $0Mg^{2+}$ /Gly/Bic), c) high  $K^{+}$ , and d) glutamate/glycine (Glu/Gly). Insets (right) show a magnification of the regions identified with a white rectangle on the left STED images. Scale bar left:  $2 \mu m$ , insets:  $1 \mu m$ . For the raw images without overlay see Supplementary Fig. 3.

74 26]. We also considered and tested live staining of the F-actin rings with fluorescent Jasplakinolide-derivative,  
75 a drug known to promote actin polymerization [2, 27, 28]. We observed that this reagent, tagged with silicone  
76 rhodamine (SiR-actin), revealed both F-actin rings and longitudinal fibers, as previously shown (Supplemen-

77 tary Fig. 2a-c) [2]. However, it was also shown that the reagent altered F-actin dynamics [29]. In fact, we  
78 noticed that the presence of F-actin fibers and bundles increased with incubation time, higher concentration  
79 of the SiR-actin label, or even post-incubation delay. To measure the impact of this Jasplakinolide-derivative  
80 on the presence of F-actin rings and longitudinal fibers, we incubated the neurons with a very low concen-  
81 tration of SiR-actin ( $0.5 \mu\text{M}$ ) for only 8 min, well below the manufacturer specification. We then fixed the  
82 cells with PFA and stained with phalloidin-STAR635 to quantify the F-actin patterns. The results show  
83 that SiR-actin pre-incubation increases the prevalence of F-actin longitudinal fiber over rings in dendrites  
84 compared to untreated neurons. These results confirm that the SiR-actin interferes with F-actin dynamics  
85 in live neurons, indicating that this approach is unsuitable to investigate the activity-dependent dynamics  
86 of F-actin remodeling. (Supplementary Fig. 2d).

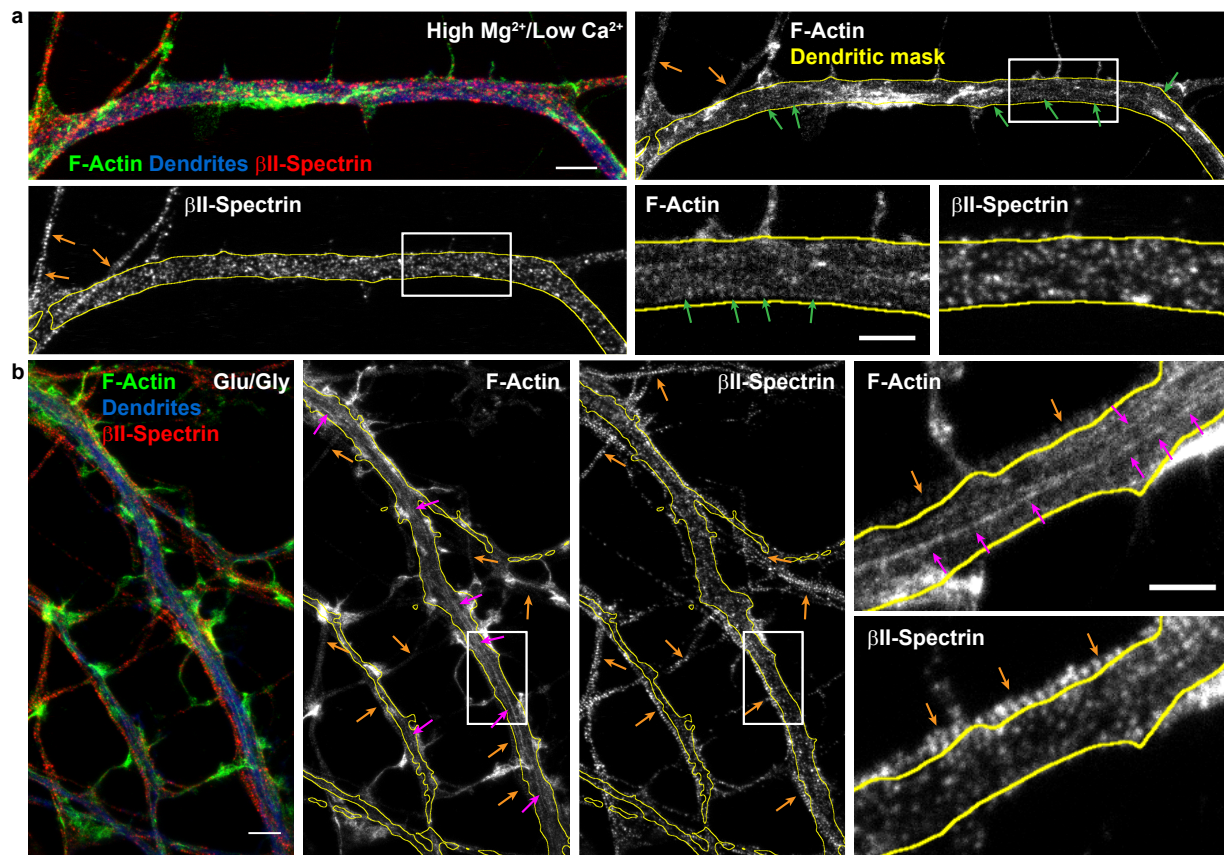

Figure 3: Two-color STED nanoscopy of F-actin and  $\beta\text{II}$ -spectrin in dendrites. (a) Low-activity high  $\text{Mg}^{2+}$ /low  $\text{Ca}^{2+}$  condition and b) Glutamate/Glycine neuronal stimulation. (a) *Top-Left* and (b) *Left*: Overlay of two-color STED nanoscopy of F-actin (green) and  $\beta\text{II}$ -spectrin (red) with confocal imaging of MAP2 (blue) to identify the dendrites. Insets show the magnified regions identified in the full single-color STED images of F-actin and  $\beta\text{II}$ -spectrin. Arrows indicate the detected F-actin and  $\beta\text{II}$ -spectrin patterns : dendritic rings (green), axonal rings (orange), and longitudinal fibers (magenta). Scale bars (a, b)  $2 \mu\text{m}$ , insets  $1 \mu\text{m}$ .

87 We thus decided to fix the neurons and triple stain them with phalloidin-STAR635 along with dendritic  
88 and axonal markers (Fig. 1, 2, and Supplementary Fig. 3) to further assess the F-actin regulation in both  
89 neuronal compartments. We next asked whether neuronal activity had an impact on the patterns of F-actin  
90 in axons and dendrites, by applying activity-promoting/inhibiting treatments on live neurons, which we then  
91 fixed and triple-stained. We manipulated neuronal activity by incubating coverslips of neurons in either i)  
92 a high  $\text{Mg}^{2+}$ /low  $\text{Ca}^{2+}$  solution (10 min) to reduce basal neuronal activity, ii) a  $0\text{Mg}^{2+}$ /glycine/bicuculline  
93 ( $0\text{Mg}^{2+}$ /Gly/Bic) solution (10 min) to promote excitatory synaptic and NMDA receptor activity, iii) a high

94 K<sup>+</sup> (40 mM) solution (2 min) to briefly depolarize neurons, or iv) a glutamate/glycine (Glu/Gly) solution  
95 (2 min) to produce a broad excitatory stimulation [30, 31]. Using STED nanoscopy, we observed activity-  
96 dependent remodelling of F-actin nanostructures on dendrites that could not be resolved with diffraction-  
97 limited confocal microscopy (Fig. 2). Increasing neuronal activity led to the reorganization of F-actin from  
98 periodical rings to longitudinal fibers (Fig. 2, green and magenta arrows). While in the low activity, high  
99 Mg<sup>2+</sup>/low Ca<sup>2+</sup> condition, dendritic F-actin rings were prevalent, the strong activity promoting stimulation  
100 Glu/Gly resulted in F-actin longitudinal fibers being predominant on most of the dendritic shaft. The brief  
101 High K<sup>+</sup> treatment induced a less pronounced reorganisation, while the synaptic stimulation 0Mg<sup>2+</sup>/Gly/Bic  
102 was associated with a patchy F-actin lattice of intercalating or overlapping rings and fibers. Strikingly, we  
103 observed little impact of any of these treatments on the presence of the axonal periodical F-actin ring pattern  
104 (Fig. 2, orange arrows). These results suggest that while the submembrane periodical F-actin rings in axons  
105 are unaffected by neuronal activity, the dendritic rings disappear with increasing neuronal activity, seemingly  
106 reorganizing into longitudinal F-actin fibers.

107 We next needed to apply a method to quantify the activity-dependent remodeling of the submembrane  
108 lattice. Several studies have examined the periodical pattern of  $\beta$ II-spectrin, which has been shown to be very  
109 clearly labelled in axons using  $\beta$ II-spectrin antibodies and readily quantifiable using autocorrelation routines  
110 [1, 3, 11]. In dendrites however, the concentration of  $\beta$ II-spectrin varies during developments [3, 4] and is  
111 more sparsely distributed in the dendritic lattice, compared to the axonal one [4, 12]. We nevertheless  
112 wanted to examine whether immunolabeling the neurons with  $\beta$ II-spectrin could help our quantification.  
113 We performed two-color STED nanoscopy of F-actin (Phalloidin-STAR635) and  $\beta$ II-spectrin (STAR580), in  
114 combination with confocal imaging of MAP2 (STAR488) to identify the dendrites. Hippocampal neurons (13  
115 DIV), incubated in a high Mg<sup>2+</sup>/low Ca<sup>2+</sup> to reduce neuronal activity, showed clear F-actin periodical ring  
116 patterns in dendrites, while the  $\beta$ II-spectrin pattern was less organized (Fig. 3a, green arrows). In contrast,  
117 the  $\beta$ II-spectrin periodical pattern in the axons was clearly detected (Fig. 3b, orange arrows).

118 We tested the strongest condition of activity-dependent remodelling of F-actin observed (Glu/Gly;  
119 Fig. 2d). While this treatment elicited a clear formation of longitudinal F-actin fibers in dendrites, the  
120 pattern of  $\beta$ II-spectrin appeared again disorganized. Meanwhile, in axons, the periodical  $\beta$ II-spectrin and  
121 F-actin patterns remained stable and clear after glutamate/glycine stimulation (Fig. 3b). Since the preva-  
122 lence of the different spectrin isoforms ( $\beta$ II,  $\beta$ III,  $\beta$ IV) changes during development in dendrites and differs  
123 compared to axons[3, 4], it is possible that labelling only one spectrin subtype is not optimal to resolve  
124 the dendritic lattice organization. We thus elected to continue monitoring F-actin to quantify the activity-  
125 dependent remodeling of the submembrane lattice.

126 To characterize the prevalence of F-actin nanostructures in axons and dendrites, whole-image labelling  
127 has previously been applied [2]. We considered a quantitative approach, in which we manually labeled the  
128 F-actin rings or longitudinal fibers using polygonal bounding boxes to evaluate the remodelling of F-actin  
129 (Suppl. Fig. 4). However the diversity of patterns, highly variable across neurons, posed a significant  
130 challenge of time consuming manual annotation (average labeling time of 30 min per image). Furthermore,  
131 the large image sizes ( $1 \times 10^6$  to  $9 \times 10^6$  pixels) made this process tedious and subject to decision fatigue [32],  
132 thereby limiting its application for testing several conditions. We thus decided to develop a high throughput  
133 analysis framework for the quantification of the activity-dependent F-actin reorganization in dendrites and  
134 axons.

## 135 Deep learning based analysis of F-actin nanostructures in axons and 136 dendrites

137 To achieve reliable and high throughput quantification of the F-actin patterns at the nanoscale, we imple-  
138 mented a deep learning approach for the precise segmentation of F-actin rings and longitudinal fibers on  
139 STED images (Fig. 4). We chose to use a modified version of the U-Net architecture, a fully convolutional  
140 network (FCN), as it is known to perform well for biomedical image segmentation [15] (See Materials and  
141 Methods and Fig. 4a). Training such network generally requires a large amount of labeled data or the use  
142 of massive data augmentation [15]. However, the tediousness of the data labeling process of these complex  
143 F-actin patterns limited the amount of available data for FCN training. Meanwhile, data augmentation relies  
144 on the possibility to add new training samples by distorting or modifying existing samples in such a way that

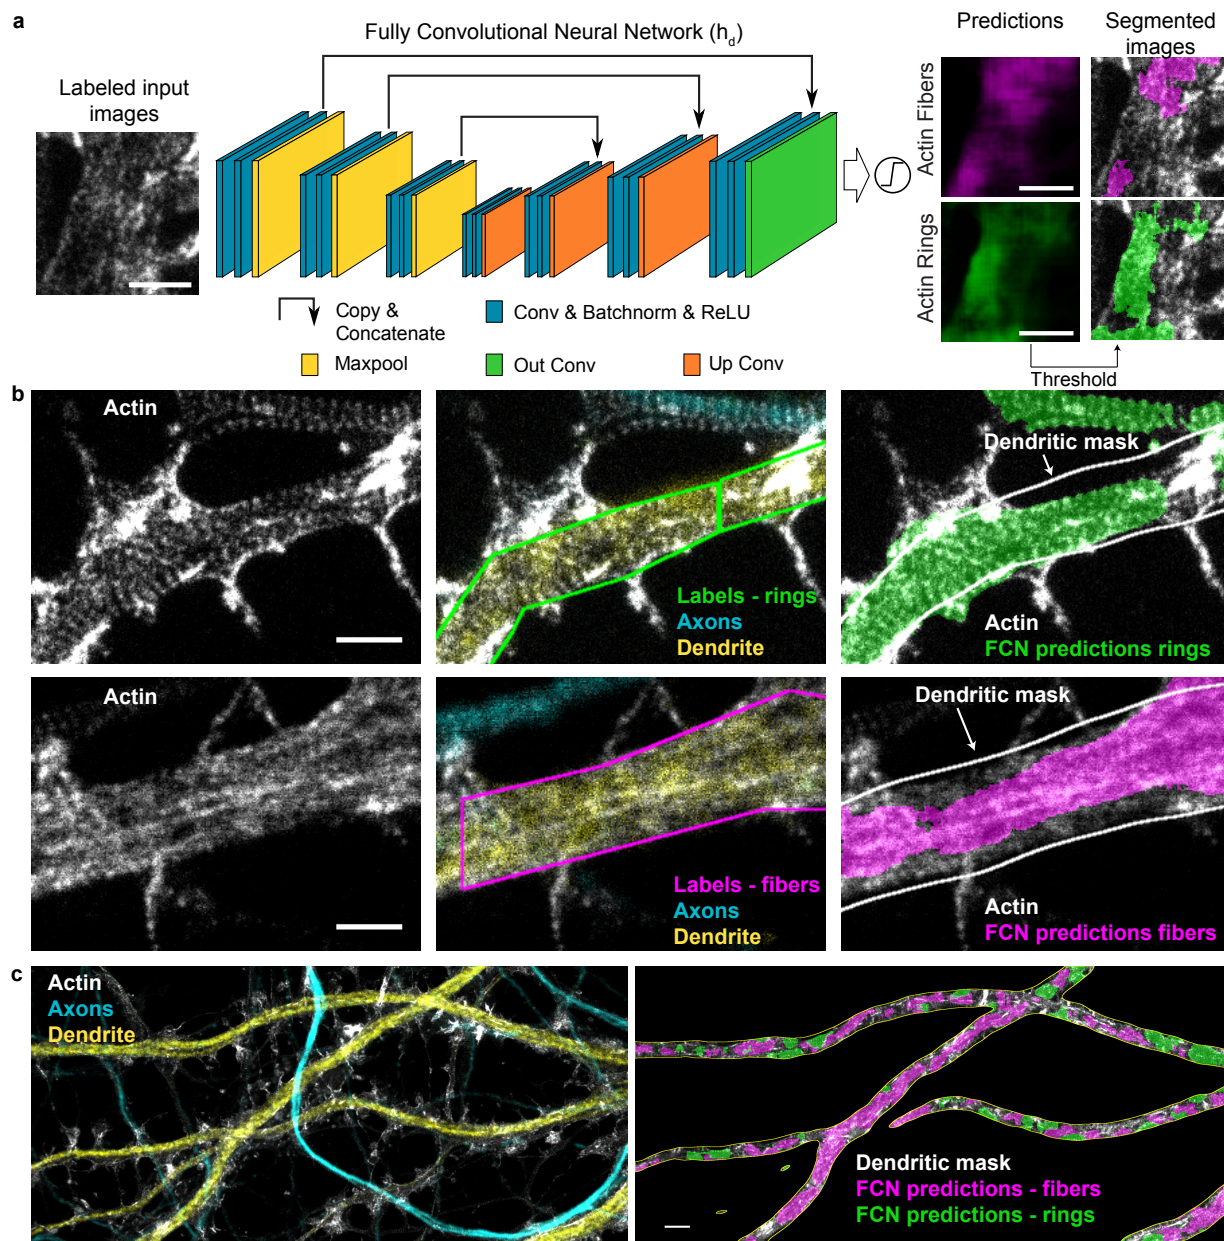

Figure 4: Segmentation of F-actin rings and longitudinal fibers using a fully convolutional neural network. a) Architecture of the fully convolutional network (FCN) ( $h_d$ ), which is a modified 2D U-Net (see Materials and Methods for specific implementation details, Conv : Convolution, Batchnorm : Batch Normalization, ReLU : Rectified Linear Unit).  $h_d$  is trained with images labeled for F-actin rings (green) and fibers (magenta). It generates scores between 0 and 1 for each pixel to create prediction maps for both structures. Independent thresholds are applied for rings (0.25) and fibers (0.4) to obtain two segmentation maps (see Materials and Methods and Supplementary Fig. 7). b) Comparison between the labeling of an expert (middle) and the corresponding FCN segmented image (right) on a representative image from the testing dataset. MAP2 (yellow) and phosphorylated neurofilaments (cyan) immunostaining and corresponding confocal images are used to identify dendrites and axons, respectively. Quantification of F-actin rings and fibers was performed within a dendritic mask generated from the MAP2 channel (white line, right). c) Representative input image analyzed with the FCN. The segmented area for F-actin rings (green) and fibers (magenta) is calculated inside the dendritic mask (white line) (right image) for each image. Scale bars (a, b) 1  $\mu\text{m}$ , (c) 2  $\mu\text{m}$ . For the raw images without overlay see Supplementary Fig. 5.

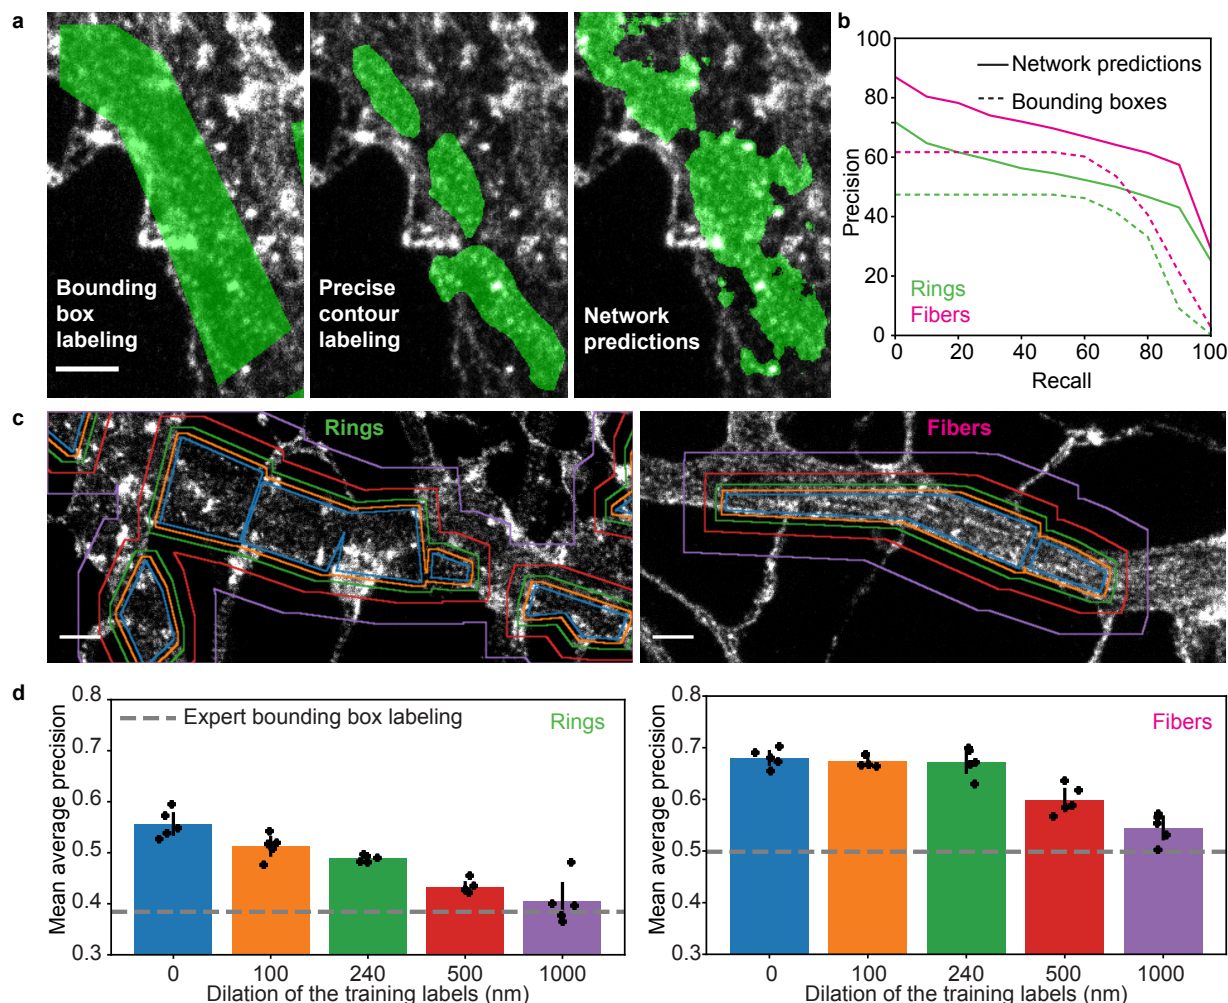

Figure 5: Performance evaluation of the FCN  $h_d$  in the context of weakly supervised learning and labeling errors. a) Comparison between manual bounding box (left), precise contour (middle) and FCN predicted (right) labeling of the dendritic F-actin ring pattern (For the raw image without overlay see Supplementary Fig. 8). b) Precision-recall curves for F-actin rings (green) and longitudinal fibers (magenta). The area under the curve, or average precision (AP), was calculated for both patterns. The network achieved a AP score of 0.53 and 0.67 for F-actin rings and fibers respectively compared to 0.38 and 0.5 for the manual bounding box labeling (using the precise contour labeling as the ground truth). The higher performance observed for the predictions compared to the bounding box labeling shows that the network is able to infer precise segmentation rules using only coarse examples. c) Generation of a training dataset to characterize the impact of coarse labeling on the precision of  $h_d$  by stepwise dilation (original labels - blue, 100 nm - orange, 240 nm - green, 500 nm - red, 1  $\mu\text{m}$  - violet) of the training labels for F-actin rings (left) and fibers (right). d) The AP scores were calculated for 5 different instances of the network for each dilation step. For F-actin fibers (right) dilation up to 1  $\mu\text{m}$  still resulted in network predictions with significantly higher precision than manual bounding box labeling (post-hoc t-test,  $p_{\text{original}} = 1.8210 \times 10^{-6}$ ,  $p_{100\text{nm}} = 2.4291 \times 10^{-7}$ ,  $p_{240\text{nm}} = 1.8530 \times 10^{-5}$ ,  $p_{500\text{nm}} = 2.7931 \times 10^{-4}$ ,  $p_{1\mu\text{m}} = 9.7314 \times 10^{-3}$ ). For the F-actin ring patterns, a dilation of 1  $\mu\text{m}$  led to comparable AP than the expert labeling (post-hoc t-test,  $p_{1\mu\text{m}} = 0.3309$ ), while smaller dilation steps led to significantly higher AP scores compared to bounding box labeling (post-hoc t-test,  $p_{\text{original}} = 1.9383 \times 10^{-5}$ ,  $p_{100\text{nm}} = 4.1884 \times 10^{-5}$ ,  $p_{240\text{nm}} = 2.2539 \times 10^{-7}$ ,  $p_{500\text{nm}} = 2.3219 \times 10^{-4}$ ). Black lines represent the 95% confidence interval calculated from the t-statistics distribution. Scale bars 1  $\mu\text{m}$ .



145 it does not alter their semantic interpretation. In the context of super-resolution microscopy, many of the  
146 usual alterations (stretching, noise addition, etc.) affect the spatial relation between fluorescent structures.

147 Considering these constraints, we formulated the segmentation task as a weak supervision problem to  
148 generate a sufficiently large dataset [20]. The expert had to label the F-actin patterns using polygonal  
149 bounding boxes instead of carefully drawing contours of each pattern (Fig. 4b, Supplementary Fig. 4),  
150 thereby reducing considerably the required labeling time to generate the necessary dataset. We trained a  
151 first FCN (see Materials and Methods) for the detection of F-actin rings and longitudinal fibers in dendrites  
152 ( $h_d$ , Fig. 4, Supplementary Fig. 5). A second one,  $h_a$ , was trained to detect solely F-actin rings in axons since  
153 we did not observe longitudinal fibers in axons regardless of the experimental condition ( $h_a$ , Supplementary  
154 Fig. 6a). We characterized the performance of both FCNs using standard metrics such as F1-score, specificity,  
155 sensitivity and precision (see subsection on Performance Metrics in the Material and Methods, Supplementary  
156 Fig. 6, 7). To assess the suitability of this method for the quantitative analysis of the ratios between F-actin  
157 rings and longitudinal fibers in dendrites (Fig. 4c), we compared detected areas obtained by expert or  $h_d$   
158 labeling (Supplementary Fig. 7c). The results show no significant difference in the F-actin rings and fibers  
159 ratio detected by  $h_d$  and an expert (Supplementary Fig. 7c).

160 Fig. 5a,b demonstrate that  $h_d$  can use these labels to learn identifying the structures of interest, while gen-  
161 erating more accurate segmentation compared to the coarse labels it was provided with. The precision-recall  
162 curves (Fig. 5b) were obtained from the comparison of the FCN predictions and bounding box annotations  
163 with a precisely annotated dataset, which is considered as the ground truth (P, see Materials and Methods).  
164 We observe a higher precision for  $h_d$  segmentation over all range of recall compared to polygonal bounding  
165 box annotations, implying that the labels generated by the network are closer to the ground truth than the  
166 manual bounding box annotations. Without learning precise segmentation rules, the system performance  
167 would be upper-bounded by the quality of the segmentation provided by a polygonal bounding box on P.  
168 This ability to cope with less precise and missing information is a key element in the application of deep  
169 learning methods for high throughput bio-imaging segmentation tasks, where the acquisition of more or  
170 better labeled images can be impracticable. To better characterize this ability, we designed two experiments.  
171 We first tested the sensitivity of  $h_d$  to omission of ground truth labels in the training dataset (polygonal  
172 bounding boxes), since we observed that manual labeling of large microscopy images was prone to this type  
173 of labeling errors. To this extent, we removed up to 70% of the expert labels in the training dataset, while  
174 keeping the number of training crops constant (See Materials and Methods and Supplementary Fig. 9).  
175 We observed that the performance of  $h_d$  is only slightly affected by sparse expert labeling and that even  
176 removing one out of two labels on the F-actin patterns resulted in a precision comparable to the original one  
177 (Supplementary Fig. 9a,b).

178 We also characterized how coarse labeling would influence the precision of the network. To this extent,  
179 we carefully labeled a small dataset of 70 images to calculate the average precision score (AP) of manual  
180 bounding box labeling (Fig. 5d, gray dotted line). We next compared the AP of manual bounding box  
181 labeling to the performance of  $h_d$  trained with increasing label size (obtained by stepwise uniform dilation of  
182 the bounding box labels, see Materials and Methods, Fig. 5c,d). Our results show that even 1  $\mu\text{m}$  dilation of  
183 the training labels for the F-actin fibers and 500 nm dilation for the F-actin rings still lead to a significantly  
184 higher AP score compared to manual bounding box labeling (Fig. 5d). We thus concluded that our weakly  
185 supervised deep learning approach was reliable to analyse quantitatively the remodeling of F-actin patterns  
186 at the nanoscale in neurons.

## 187 **Quantification of the activity-dependent reorganization of the F-** 188 **actin lattice in dendrites and axons using deep learning**

189 We first used the FCN  $h_a$ , trained on bounding boxes identifying axonal F-actin rings, to quantify the  
190 presence of this structure in axons for different levels of neuronal activity (Fig. 6a,b, Supplementary Fig. 10).  
191 Using this approach, we measured the area of detected F-actin rings within axons, co-stained with SMI31 to  
192 generate an axonal mask (mean total length per image of  $151 \pm 89 \mu\text{m}$  and maximal branch length of  $32 \pm 13 \mu\text{m}$ ,  
193 Fig. 6a, Supplementary Fig. 11a,b). This allowed to automatically quantify the proportion of F-actin rings  
194 in axons on a large dataset and for different neuronal activity levels (150 neurons, 4 independent cultures,  
195 4 experimental conditions). Our quantitative approach reliably detected an F-actin periodical lattice in all

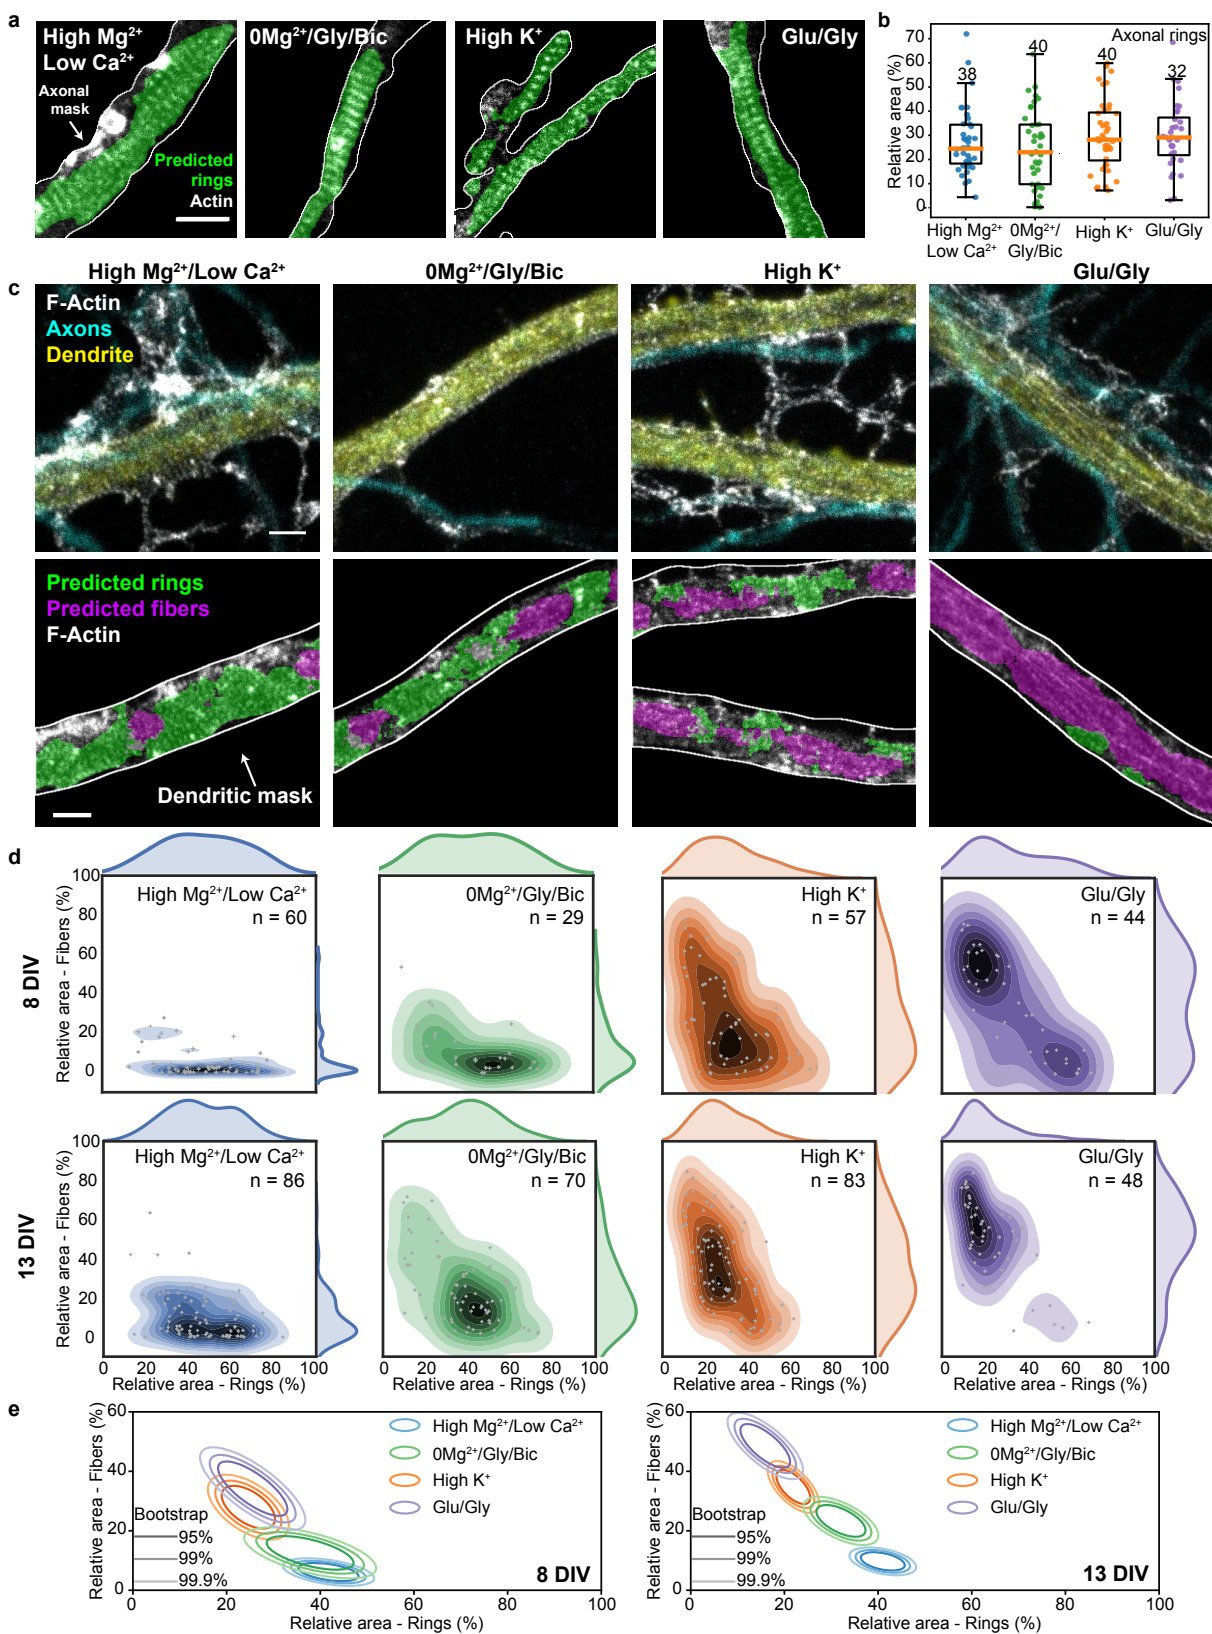

Figure 6: Increasing neuronal activity induces the reorganization of F-actin rings into longitudinal fibers in dendrites but not in axons. a) Representative images of the periodical F-actin rings in axons of neurons exposed to 4 different treatments modulating neuronal activity. The area of F-actin rings segmented by the FCN  $h_a$  is shown in green. b) The detected area for axonal rings in 13 DIV neurons remains unchanged upon stimulation (one-sided ANOVA,  $p = 0.2525$ , numbers above each boxes indicate the number of neurons from 4 independent cultures). c) Representative images of the periodical F-actin lattice and the longitudinal fibers in dendrites of 13 DIV neurons for four different treatments modulating neuronal activity : *Top* STED Images of F-actin stained with Phalloidin-STAR635 overlaid with the confocal images of the dendritic (MAP2, yellow) and axonal (phosphorylated neurofilaments, cyan) makers. *Bottom*: Predictions of the FCN for F-actin rings (green) and fibers (magenta) inside the dendritic mask (white line). d) Bivariate kernel density estimate of the raw data (grey cross) for 8 DIV and 13 DIV neurons treated with i) high  $Mg^{2+}$ /low  $Ca^{2+}$  for 10 min (blue), ii)  $0Mg^{2+}$ /Gly/Bic for 10 min (green), iii) high  $K^+$  for 2 min (orange) and iv) Glu/Gly for 2 min (violet). e) Mean distributions using bootstrapping. The formation of F-actin fibers is enhanced for 13 DIV neurons compared to 8 DIV neurons for the synaptic stimulation  $0Mg^{2+}$ /Gly/Bic or Glu/Gly, but not for high  $K^+$  stimulations. Shown are the regions comprising 95%, 99% and 99.9% of the data point distribution. Scale bars  $1 \mu m$ . d,e) Number of independent cultures (N) : high  $Mg^{2+}$ /low  $Ca^{2+}$   $N_{8DIV} = 6, N_{13DIV} = 9$ ;  $0Mg^{2+}$ /Gly/Bic  $N_{8DIV} = 4, N_{13DIV} = 8$ ; high  $K^+$   $N_{8DIV} = 6, N_{13DIV} = 9$ ; Glu/Gly  $N_{8DIV} = 5, N_{13DIV} = 6$ . Note that the detected areas for dendrite and axons cannot be compared since the detection of F-actin rings was performed with two different FCNs and using different foreground masks. Only a comparison between the stimulation conditions for each experiment (dendrites or axons) is possible. Scale bars  $1 \mu m$ . For the raw image without overlay see Supplementary Fig. 10

196 analysed images of axons and revealed no activity-dependent change in its prevalence (one-sided ANOVA,  $p$   
197 = 0.2525, Fig. 6b).

198 By contrast, our deep-learning based approach revealed significant effects on the F-actin patterns in  
199 dendrites of 13 DIV neurons (we also observed a clear activity-dependent remodeling in the soma, but did  
200 not quantify it, Supplementary Fig. 1). Automated analysis of the F-actin patterns within a dendritic mask  
201 was performed using the MAP2 confocal signal (mean total length per image of  $71 \pm 36 \mu m$  and maximal  
202 branch length of  $42 \pm 10 \mu m$ , Fig. 6c, Supplementary Fig. 11c,d). The analysis revealed a remodelling of the  
203 F-actin rings into longitudinal fibers, scaling with the strength of the activity promoting stimuli (Fig. 6c).  
204 Under reduced neuronal activity (high  $Mg^{2+}$ /low  $Ca^{2+}$ ), the dendritic F-actin rings were most prevalent,  
205 while longitudinal fibers were rarely detected (Fig. 6c-e). We used a high  $Mg^{2+}$ /low  $Ca^{2+}$  solution to  
206 reduce neuronal activity as the variability between neurons in the prevalence of F-actin rings and fibers  
207 was reduced compared to untreated cells (see Supplementary Fig. 12). Promoting synaptic activity with  
208  $0Mg^{2+}$ /Gly/Bic significantly reduced the proportion of dendritic area exhibiting F-actin rings and increased  
209 the prevalence of longitudinal fibers ( $p = 2.9 \times 10^{-6}$ , randomization test (RdT, see Materials and Methods)).  
210 The ring pattern was even more strongly reduced with brief (2 min) high  $K^+$  or Glu/Gly stimulation ((RdT  
211 :  $p_{highK^+} = 9.1 \times 10^{-15}$ ,  $p_{Glu/Gly} = 0$ , Fig. 6c-e). Meanwhile, we observed a correlative progression of the  
212 formation of F-actin longitudinal fibers with the strength of neuronal activity stimulation (Fig. 6c-e). These  
213 F-actin fibers did not colocalize with microtubules (Supplementary Fig. 13), suggesting that both structures  
214 are not directly associated. These results indicate that while neuronal activity has no impact on the stability  
215 of the F-actin submembrane lattice in axons, it causes its reorganization into longitudinal fibers in dendrites.

216 Since the F-actin/spectrin lattice has been reported to be regulated by neuronal development in den-  
217 drites [2, 4], we compared the effects of the different stimuli on 8 and 13 DIV neurons (Fig. 6d,e). The  
218 results indicated that dendritic F-actin rings were slightly more prevalent, whereas fibers were less prevalent,  
219 in young neuron compared to older ones, at low neuronal activity (high  $Mg^{2+}$ /low  $Ca^{2+}$ ). Synaptic stimu-  
220 lation ( $0Mg^{2+}$ /Gly/Bic) elicited a significantly stronger F-actin dendritic reorganization in mature cultures,  
221 whereas broad membrane depolarization with high  $K^+$  caused a similar extent of reorganization at both  
222 ages (RdT:  $p_{0Mg^{2+}/Gly/Bic} = 0.01$ ,  $p_{highK^+} = 0.14$ ). Finally, Glu/Gly stimulation caused a strong remodeling  
223 of F-actin in young neurons and a nearly complete transition to dendritic fibers in mature cultures (RdT:  
224  $p_{Glu/Gly} = 1.1 \times 10^{-4}$ , Fig. 6d,e). These results indicate that the activity-dependent remodeling of dendritic  
225 F-actin cytoskeleton is more pronounced in mature and more synaptically connected neurons.

226 To test whether the impact of the  $0\text{Mg}^{2+}/\text{Gly}/\text{Bic}$  stimulation depended on action potential firing, we  
227 tested the effect of co-application of the sodium channel blocker tetrodotoxin (TTX). We observed a partial  
228 but significant reduction in F-actin remodeling by TTX (RdT:  $p = 1.4 \times 10^{-3}$ , Fig. 7a,b). It was shown that  
229 miniature excitatory potentials can drive NMDA receptor (NMDAR) activity in absence of  $\text{Mg}^{2+}$  [33]. We  
230 thus tested the effect of NMDAR blocker (2R)-amino-5-phosphonovaleric acid (APV) on the  $0\text{Mg}^{2+}/\text{Gly}/\text{Bic}$   
231 stimulus and found that it reduced more strongly the F-actin remodeling (RdT:  $p = 2.5 \times 10^{-5}$ , Fig. 7a-c,  
232 Supplementary Fig. 14), compared to TTX. These results indicate that synaptic NMDAR activity can trigger  
233 F-actin remodeling from a ring to fiber pattern in dendrites.

234 Neuronal depolarization and NMDAR activities drive  $\text{Ca}^{2+}$  influx, which activates a wide range of den-  
235 dritic signaling processes. We thus assessed whether  $\text{Ca}^{2+}$  influx was mediating the high  $\text{K}^{+}$ -induced remodel-  
236 ing of dendritic F-actin cytoskeleton, by either i) increasing the  $\text{Ca}^{2+}$  concentration or ii) blocking  $\text{Ca}^{2+}$  entry  
237 with  $\text{Cd}^{2+}$ . In comparison to regular  $\text{Ca}^{2+}$  concentration (1.2 mM), 2.4 mM caused a significantly stronger  
238 reduction in F-actin rings accompanied by an increase in F-actin fibers (RdT:  $p_{2.4\text{mM}\text{Ca}^{2+}} = 6.6 \times 10^{-5}$ ,  
239 Fig. 7d-f). Application of  $\text{Cd}^{2+}$  during the stimulation prevented the activity-dependent reorganization of  
240 the F-actin cytoskeleton; no significant reorganization of the F-actin cytoskeleton was observed compared  
241 to high  $\text{Mg}^{2+}/\text{low Ca}^{2+}$  condition (RdT:  $p_{\text{Cd}^{2+}} = 0.06$ , Fig. 7d-f, Supplementary Fig. 14). These results  
242 indicate a clear  $\text{Ca}^{2+}$ -dependence for the activity-dependent F-actin remodeling in dendrites.

243 Finally, we assessed whether the F-actin remodelling was reversible by washing the neurons with high  
244  $\text{Mg}^{2+}/\text{low Ca}^{2+}$  activity blocking solution for 15 min after a 2 min high  $\text{K}^{+}$  stimulation. We observed a  
245 partial recovery of the F-actin rings combined with a strong reduction in F-actin fibers following the 15 min  
246 wash. These results suggest that the activity-dependent remodeling of F-actin is at least partially reversible  
247 ( $p = 3.1 \times 10^{-4}$ , Fig. 7d,e).

## 248 Discussion

249 Our results demonstrate that the somatodendritic F-actin-based lattice is highly dynamic compared to that  
250 of the axon. While it was known that the dendritic lattice is distributed in a more patchy fashion, we show  
251 here that this difference is likely due, at least partially, to a distinct response to neuronal activity, which  
252 destabilizes the lattice only in dendrites and somata (Fig. 8). The sporadic presence of the submembrane  
253 lattice previously reported in dendrites may thus be due to variable levels of electrical or synaptic activities  
254 in the neuronal culture preparations, which have not been specifically controlled and which also depend on  
255 the developmental stage of the preparation [1, 2, 4, 12]. In our study, we specifically controlled both the  
256 neuronal activity level and the developmental stage of the preparation and found that the extent of dendritic  
257 remodeling is more pronounced in more mature and synaptically connected neurons. Another source of  
258 variability may have arisen from inconsistent use of specific axonal and dendritic markers to discriminate  
259 these processes. We found it critical to have double labeling of both axonal and dendritic markers in our  
260 cultures, as these distinct processes exhibit considerable spatial overlap, while their F-actin-based membrane  
261 lattice reacts differently to neuronal stimulation.

262 We demonstrated that the activity-dependent disappearance of the somatodendritic submembrane lattice  
263 coincided with the formation of F-actin longitudinal fibers. The simplest interpretation of this observation  
264 is that the F-actin underwent restructuring from a ring to fiber pattern. This putative remodeling would  
265 be demonstrated more clearly using live imaging, however, as we described and discussed above, currently  
266 available F-actin probes either do not reveal, or interfere with, the F-actin lattice dynamics. Nevertheless,  
267 the  $\text{Ca}^{2+}$ -dependence of this proposed remodeling is consistent with previous work showing that nucleation,  
268 capping, and severance of F-actin is regulated by  $\text{Ca}^{2+}$  [34]. Meanwhile the lattice remodeling might also  
269 be modulated by spectrin cleavage through  $\text{Ca}^{2+}$ -dependent calpain [11, 35]. The reasons why the axonal  
270 lattice is resistant to enhanced neuronal activity remain to be determined. The elevation in axonal  $\text{Ca}^{2+}$  may  
271 be reduced compared to other domains. Alternatively, the composition of the lattice may differ in axons,  
272 making it less sensitive to  $\text{Ca}^{2+}$ -mediated destabilisation. The selective presence in axons of transmembrane  
273 and extracellular matrix-interacting proteins, such as neurofascin, which has been shown to intercalate with  
274 F-actin rings in axons [2], may have a stabilizing role for the submembrane lattice.

275 The stability of the membrane-associated cytoskeleton was shown to be important for RTK signaling [11].

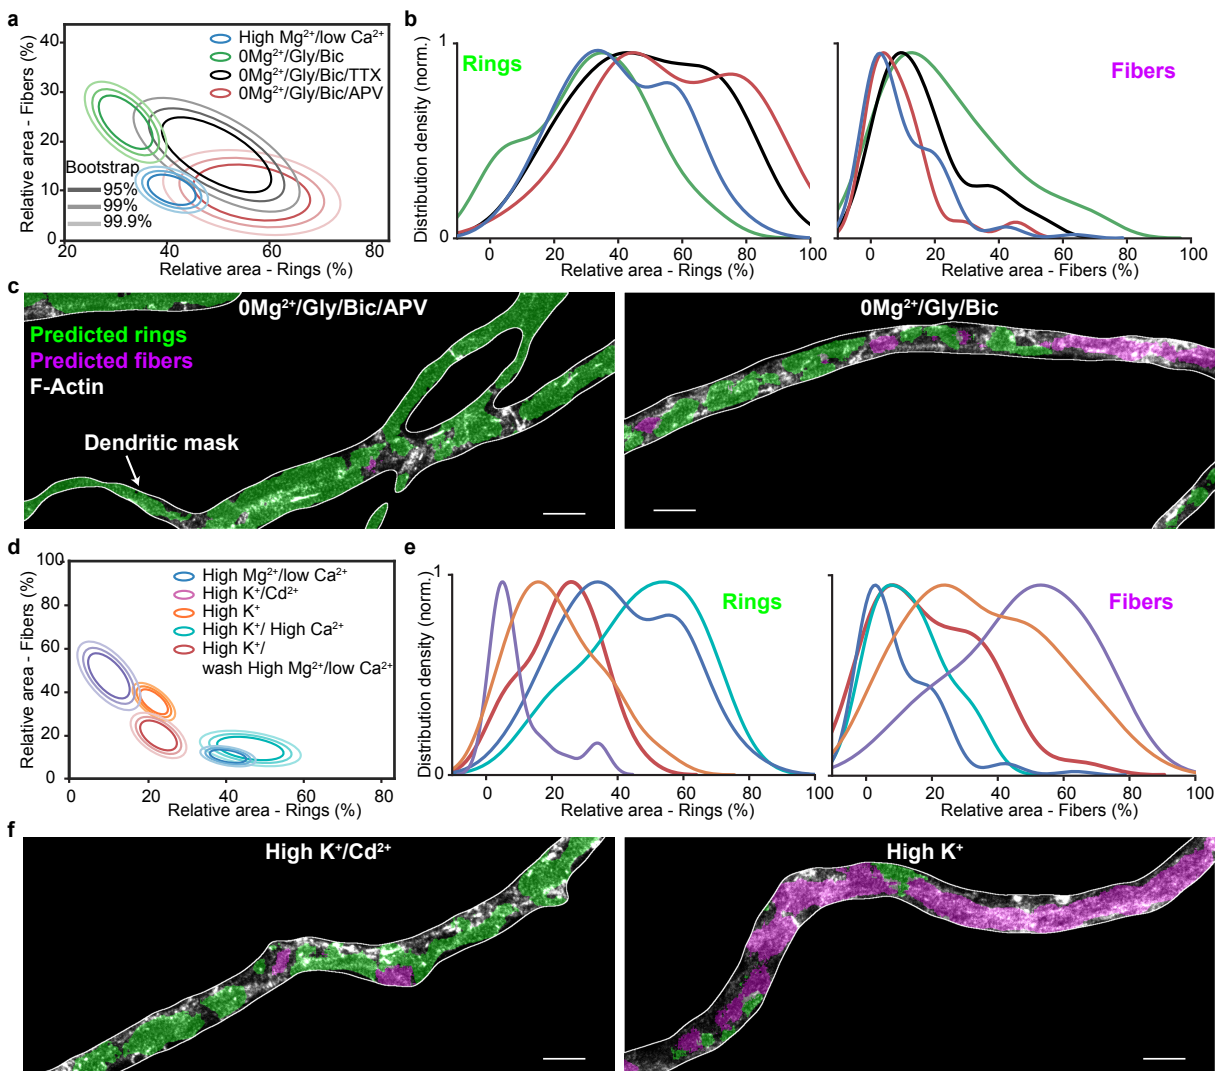

Figure 7: Synaptic NMDAR activity and  $\text{Ca}^{2+}$  influx can drive a reversible dendritic F-actin reorganization from a ring to fiber pattern. a) Mean distributions of dendritic F-actin rings and fibers using bootstrapping for synaptic stimulation ( $0\text{Mg}^{2+}/\text{Gly}/\text{Bic}$  for 10 min) without (green) or with TTX (violet) or APV (red) compared with the low activity high  $\text{Mg}^{2+}/\text{low Ca}^{2+}$  condition (blue). b) Density distribution of the raw data. TTX ( $1\ \mu\text{M}$ ) partially but significantly blocks the F-actin remodeling caused by  $0\text{Mg}^{2+}/\text{Gly}/\text{Bic}$  stimulation, while APV ( $25\ \mu\text{M}$ ) blocks it further ( $p = 1.4 \times 10^{-3}$  and  $p = 2.5 \times 10^{-5}$  respectively). c) Representative images of neurons treated with  $0\text{Mg}^{2+}/\text{Gly}/\text{Bic}$  with (left) and without (right) APV segmented with our deep learning based approach. d) Mean distributions of dendritic F-actin rings and fibers using bootstrapping for 2 min high  $\text{K}^{+}$  stimulation ( $1.2\ \text{mM Ca}^{2+}$ , orange) or with  $2.4\ \text{mM Ca}^{2+}$  (violet) or with  $1.2\ \text{mM Ca}^{2+}$  and  $50\ \mu\text{M Cd}^{2+}$  (pink). The red circles indicate the same high  $\text{K}^{+}$  stimulation ( $1.2\ \text{mM Ca}^{2+}$ ) condition followed by 15 min wash in high  $\text{Mg}^{2+}/\text{low Ca}^{2+}$ . The F-actin remodeling is  $\text{Ca}^{2+}$ -dependent and reversible, at least partially within 15 min. e) Density distribution of the raw data. f) Representative images of neurons treated with high  $\text{K}^{+}$  stimuli with (left) and without (right)  $\text{Cd}^{2+}$  segmented with our deep learning based approach. Statistical analysis performed with a randomization test (see Materials and Methods). Number of independent cultures (N) and number of neurons (n): high  $\text{Mg}^{2+}/\text{low Ca}^{2+}$   $N = 9$ ,  $n = 86$ ,  $0\text{Mg}^{2+}/\text{Gly}/\text{Bic}$   $N = 8$ ,  $n = 70$ ;  $0\text{Mg}^{2+}/\text{Gly}/\text{Bic}$   $1\ \mu\text{M TTX}$   $N = 2$ ,  $n = 20$ ;  $0\text{Mg}^{2+}/\text{Gly}/\text{Bic} + 25\ \mu\text{M APV}$   $N = 2$ ,  $n = 20$ ; high  $\text{Mg}^{2+}/\text{low Ca}^{2+}$   $N = 9$ ; high  $\text{K}^{+}/1.2\ \text{mM Ca}^{2+}$   $N = 9$ ,  $n = 83$ ; high  $\text{K}^{+}/2.4\ \text{mM Ca}^{2+}$   $N = 2$ ,  $n = 20$ ; high  $\text{K}^{+}/50\ \mu\text{M Cd}^{2+}$   $N = 2$ ,  $n = 22$ ; high  $\text{K}^{+}/15\ \text{min wash high Mg}^{2+}$   $N = 3$ ,  $n = 32$ . For the raw images without overlay see Supplementary Fig. 14

276 The activity-dependent remodeling of the F-actin based lattice into F-actin longitudinal fibers might, on the  
277 other hand, be necessary for some dendritic signaling mechanisms, such as endo/exocytosis, membrane  
278 receptor lateral movement, intracellular trafficking or spine formation. In contrast, the stable lattice in  
279 axons might limit transmembrane receptor movement [36], which could support a tight location of voltage-  
280 dependent channels critical for action potential conduction. It might also serve to restrict exo/endocytosis  
281 to pre-synaptic terminals, where the lattice is less organized [2, 12]. In contrast, the removal of the lattice  
282 in dendritic segments may release a break on membrane receptor diffusion and exo/endocytosis, or spine  
283 formation. Meanwhile, the activity-dependent formation of F-actin longitudinal fibers in dendrites may  
284 serve to promote active cargo transport [5, 37] and targeting of material to synapses [7]. As such, the  
285 activity-dependent conversion of membrane-associated rings to intracellular fibers of the dendritic F-actin  
286 cytoskeleton may be essential for synaptic plasticity. In this context, we found that NMDA receptor function,  
287 which is crucial for synaptic plasticity, was essential in supporting the remodeling of the dendritic F-actin  
288 rings to longitudinal fibers. Hence, of the numerous signaling processes downstream of NMDA receptor  
289 function and  $\text{Ca}^{2+}$  during synaptic plasticity, the remodeling of the dendritic F-actin-based lattice into  
290 longitudinal fibers may be of significance.

291 The quantification of these fluorescent patterns is highly difficult because of the heterogeneity and com-  
292 plexity of the signals, and because it is prone to biases. Our study emphasizes the potential of machine  
293 learning approach, as an expert surrogate, for high throughput analysis of complex and highly variable  
294 neuronal structures observed with optical nanoscopy. It became essential in order to pick up subtle differ-  
295 ences associated with developmental stages, activity levels or drug action. The segmentation task shown  
296 here presented a number of challenges related to the context of experimental biology: 1) limited number of  
297 biological samples and labeled data (keeping in mind that increasing the amount of images for the training  
298 dataset reduces the available dataset for biological analysis), 2) high variability across samples, 3) expert-  
299 dependent determination of the ground truth, 4) no direct link to other problems that could be used as a  
300 pre-training step. We demonstrated how a deep learning approach can be applied, using weak supervision  
301 and harnessing the deep network extrapolation power. We also characterized how two types of labeling  
302 problems (e.g. incomplete and decreased precision) influence the performance of the FCN in this weakly  
303 supervised learning framework. We showed that our approach was sufficiently robust to the use of coarse  
304 labeling and label omission. This should broaden the possibilities of exploiting deep learning-based analysis  
305 for high throughput biomedical image analysis, especially when the generation of a large precisely labeled  
306 training dataset is impracticable. The weakly supervised deep learning approach used in our study provided  
307 the necessary tool to investigate more effectively and accurately the activity-dependent remodeling of the  
308 dendritic F-actin cytoskeleton, and should be useful for similar types of optical imaging-based investigations  
309 of cellular signaling.

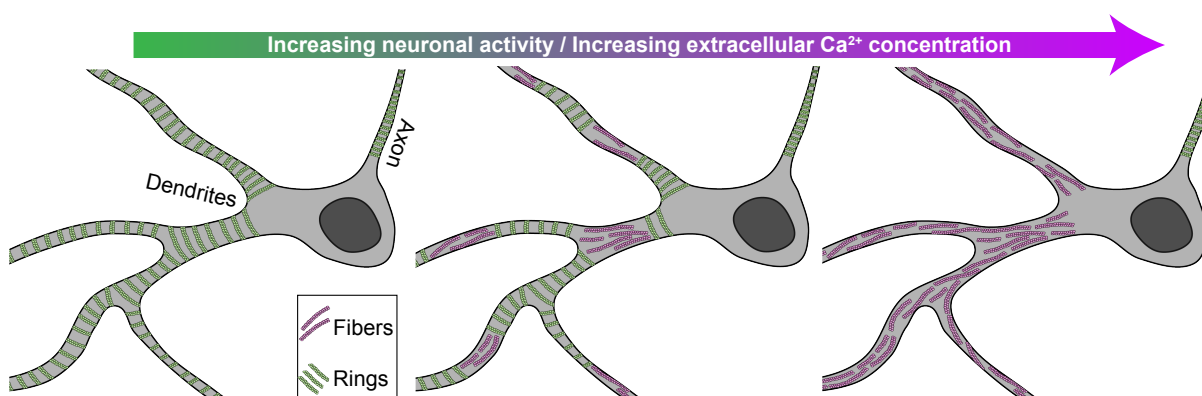

Figure 8: Schematic representation of the nanoscale patterns of F-actin cytoskeleton in axon and dendrites in a neuron undergoing variable level of neuronal activity; the periodical lattice reorganizes into longitudinal fibers in dendrites, but not in axons, with increasing neuronal/ $\text{Ca}^{2+}$  activity.

## 310 **Materials and Methods**

### 311 **Cell culture and neuronal stimulations**

312 Neuronal cultures were prepared from neonatal Sprague Dawley rats. We followed the guidelines of the animal  
313 care committee of Université Laval for the care and use of the rats. Before dissection of hippocampi, animals  
314 were sacrificed by decapitation, in accordance to the procedures approved by the animal care committee of  
315 Université Laval. Dissociated cells were plated on poly-d-lysine coated glass coverslips (~12mm) at a low  
316 density of 25 000 cells/ml. The growth medium consisted of Neurobasal and B27 (50:1), supplemented with  
317 penicillin/streptomycin (50 U per mL; 50 µg per mL) and 0.5 mM L-GlutaMAX (Invitrogen). High density  
318 neurons (10 million cells/mL) were plated directly in poly-d-lysine coated wells to serve as a feeding layer for  
319 the low density coverslip, placed upside down above the feeding layer. To limit proliferation of non-neuronal  
320 cells, Ara-C (2.5 µM; Sigma-Aldrich) was added to the media 2 days later. Thereon, the culture was fed  
321 twice a week by replacing ~1/3 of the growth medium with serum- and Ara-C-free medium.

322 Neuronal stimulations were performed in HEPES buffered solutions at 37°C. The following solutions  
323 were used : high Mg<sup>2+</sup>/low Ca<sup>2+</sup> (in mM: NaCl 98, KCl 5, HEPES 10, CaCl<sub>2</sub> 0.6, Glucose 10, MgCl<sub>2</sub>  
324 5), 0Mg<sup>2+</sup>/Gly/Bic (in mM: NaCl 104, KCl 5, HEPES 10, CaCl<sub>2</sub> 1.2, Glucose 10, MgCl<sub>2</sub> 0, Glycine 0.2,  
325 Bicuculline 0.01), high K<sup>+</sup> (in mM: NaCl 75, KCl 40, HEPES 10, CaCl<sub>2</sub> 1.2, Glucose 7.5, MgCl<sub>2</sub> 1), Glu/Gly  
326 (in mM: NaCl 102, KCl 5, HEPES 10, CaCl<sub>2</sub> 1.2, Glucose 10, MgCl<sub>2</sub> 1; Glutamate 0.1, Glycine 0.01);  
327 Osmolality: 240-250 mOsm/kg, pH: 7.35. Incubation lasted 10 min for high Mg<sup>2+</sup> and 0Mg<sup>2+</sup>/Gly/Bic  
328 treatments and 2 min for high K<sup>+</sup> and Glu/Gly stimulation. After the treatment, the cells were directly  
329 transferred in a 4% paraformaldehyde (PFA) solution for fixation (See Fixation and Immunostaining). To  
330 characterize the impact of action potential firing or NMDAR activity on F-actin reorganization during the  
331 synaptic stimulation 0Mg<sup>2+</sup>/Gly/Bic, 1µM TTX or 25 µ APV were added, respectively, to the stimulation  
332 solution. To assess the reversibility of the actin reorganization caused by high K<sup>+</sup> stimulation, cells were first  
333 stimulated 2 min in high K<sup>+</sup> solution and transferred into 37° high Mg<sup>2+</sup>/low Ca<sup>2+</sup> blocking solution for  
334 15 min prior to fixation. The effect of Ca<sup>2+</sup> on the F-actin reorganization was assessed either by increasing  
335 the Ca<sup>2+</sup> concentration of the high K<sup>+</sup> solution (CaCl<sub>2</sub> 2.4 mM) or by blocking calcium channels with Cd<sup>2+</sup>  
336 (100µM CdCl<sub>2</sub>) during high K<sup>+</sup> stimulation.

337 Latrunculin A was used to disrupt the F-actin lattice as reported previously [4]. Latrunculin A was added  
338 to the culture media for 1 h with a final concentration of 10µM. Subsequently, cells were incubated 10 min  
339 in high Mg<sup>2+</sup>/low Ca<sup>2+</sup> solution with 10 µM latrunculin A and fixed with 4% PFA solution.

### 340 **Fixation and Immunostaining**

341 Cultured hippocampal neurons were fixed in 4% PFA solution, permeabilized with 0.1% Triton X-100,  
342 blocked with 2% goat serum and immunostained as described previously [38]. To improve the F-actin  
343 staining, phalloidin was incubated for 2h following the immunostaining steps with primary and secondary  
344 antibodies. Coverslips were mounted in Mowiol-DABCO for imaging. F-actin was stained with phalloidin-  
345 STAR635 (Abberior, cat. 2-0205-002-5, 1:50 dilution). Dendrites were identified using a staining against the  
346 microtubule-associated-protein-2 with Rabbit-anti-MAP2 PAB (Milipore Sigma, cat. AB5622, 1:1000) and  
347 GAR-STAR488 SAB (Abberior, cat. 2-0012-006-5, 1:250). Axons were identified using a staining against the  
348 phosphorylated neurofilaments (SMI31) stained with the PAB mouse-anti-SMI31 (Biolegend, cat. 801601,  
349 1:250) and the SAB GAM-STAR580 (Abberior, cat. 2-0002-005-1, 1:250).

### 350 **STED-imaging**

351 Super-resolution imaging was executed on a 4 color Abberior Expert-Line STED system (Abberior Instru-  
352 ments GmbH, Germany). Imaging of F-actin stained with Phalloidin-STAR635 was performed using a 640  
353 nm pulsed diode (40 MHz), a 775 nm depletion laser (40 MHz) and a a ET685/70 (Chroma, USA) fluores-  
354 cence filter. MAP2-STAR488 and SMI31-STAR580 were imaged in confocal mode using excitation diodes at  
355 485 nm and 561 nm (40MHz), 525/50 and 615/20 (Semrock, USA) fluorescence filters respectively. Scanning

356 was conducted in a line scan mode with a pixel dwell time of  $15\mu\text{s}$  and pixel size of 20 nm. For the STED im-  
357 age of the F-actin cytoskeleton a line repetition of 5 was selected. The microscope was equipped with a 100x  
358 1.4NA, oil objective and fluorescence was detected on independent avalanche photodiode detectors (APD)  
359 with approximately 1 Airy unit detection pinhole. Our STED microscope was equipped with a motorized  
360 stage and auto-focus unit. Images were processed using FIJI (ImageJ) software [39].

## 361 Dataset

362 For the training of the FCNs presented in this work, two labeled datasets (1. Dendritic F-actin rings and  
363 fibers and 2. Axonal rings) were built using a custom labeling application developed in Python.

364 For the segmentation of dendritic F-actin ring and fiber regions, we collected a set of large STED images  
365 (between  $500 \times 500$  and  $3000 \times 3000$  pixels) of the F-actin cytoskeleton. Each image contained 3 channels: 1)  
366 F-actin (phalloidin-STAR635), 2) an axonal marker (SMI31-STAR580), and 3) a dendritic marker (MAP2-  
367 STAR488). Areas exhibiting F-actin rings and fibers were labeled by an expert on the MAP2-positive regions  
368 (Fig. 4b). The labels were additionally filtered by keeping only the regions belonging to the foreground mask  
369 generated with the MAP2 channel (Otsu thresholding operation [40] applied after a gaussian blur with  
370  $\sigma = 20$  pixels). The training, validation, and testing datasets for dendritic F-actin structures consisted  
371 in respectively 42, 52, and 105 representative images, with neurons at different activity levels in all sets.  
372 The large testing dataset was designed to include a representative distribution of images from 8 different  
373 treatment conditions as well as sufficient number (12-15) of independent cells for each condition. We could  
374 therefore compare the performance of the FCN to the manual labelling for various activity levels, ensuring  
375 that no bias was induced by FCN labelling between different treatments.

376 While a FCN could be trained on large images, it is more convenient to use smaller crops for this purpose,  
377 since the model is size independent. We thus used a  $128 \times 128$  sliding window with a 16 pixels overlap on the  
378 input images to generate a total of 2263 crops for the training set. To reduce class imbalance, we considered  
379 only crops comprising a label (rings or fibers) on at least 1% of their total area. The intensity in each  
380 crop was scaled in the  $[0, 1]$  range. For the scaling, the minimum and maximum values of each image in  
381 the dataset were computed. The median of all minima ( $m$ ) was used as  $[0]$  and the median of all maxima  
382 plus 3 standard deviation ( $M$ ) was used as  $[1]$ . This  $[m, M]$  interval was multiplied by a factor of 0.8 for the  
383 normalization. The resultant crop was clipped in the  $[0, 1]$  range to ensure the proper intensity scale for  
384 any input. Data augmentation was applied at training time (flip up-down and left-right, intensity scale and  
385 gamma adaptation), with a 50% probability for each operation.

386 For the segmentation of the periodical F-actin lattice in axons, a training set was built with 335 small  
387 images ( $224 \times 224$  pixels) of axons only stained with phalloidin-STAR635. The validation and testing set  
388 consisted in 112 and 69 images respectively. The axonal F-actin rings were labeled by an expert as described  
389 above. Sliding window, scaling and data augmentation operations were applied similarly to the dendritic  
390 dataset. For this dataset, we did not enforce any minimum labeled area.

## 391 Fully Convolutional Neural Network

392 Two FCNs were implemented ( $h_d, h_a$ ) based on the well-known U-Net architecture (Fig. 4a and Supplemen-  
393 tary Fig. 6a) [15] using the PyTorch library.

394 The first FCN ( $h_d$ ) was designed for the detection of dendritic F-actin rings and fibers. Each resolution  
395 step in the contracting path is composed of two sets of  $3 \times 3$  convolutional layers, followed by a batch nor-  
396 malization and a  $2 \times 2$  max-pooling. The layer sizes are of  $\{16, 32, 64, 128\}$  filters respectively. The layers in  
397 the expanding path are symmetrical to the contracting path, but with an additional  $2 \times 2$  transposed con-  
398 volution (stride of 2). As in the seminal implementation, skip links allow to keep and propagate information  
399 at various scales. A final  $1 \times 1$  convolutional layer collapses the features into two segmentation maps, one for  
400 the F-actin rings and one for the F-actin fibers (Fig. 4a). Since a region can contain both rings and fibers,  
401 we treated each network output independently. Rectified linear unit (ReLU) activation was used throughout  
402 the network, except for the output layer, which uses a sigmoid.

403 The loss function was a root mean squared error (RMSE), and we used early stopping on the validation  
404 set to ultimately keep a model with good generalization properties. The Adam optimizer was used with a



405 learning rate of 0.001, with the other parameters kept to their default values. Batch size was set at 72.

406 To obtain a binary segmentation map, a hard threshold had to be applied on the network predictions. To  
407 compute the optimal thresholds for the two independent channels, we generated receiver operating curves  
408 (ROC) using the validation set. We computed the euclidean distance between the false positive and true  
409 positive rate (FPR, TPR) coordinate of the thresholds to the optimal operation point (FPR=0, TPR=1)  
410 and took the threshold having the smallest distance (Supplementary Fig. 7). The optimal threshold (rings:  
411 0.25, fibers: 0.4) was obtained from the median of the thresholds calculated on the ROC curves of 15 low  
412 activity and 8 high activity images. Note that these thresholds could be easily adjusted to adapt to different  
413 imaging conditions in other experiments.

414 We trained a total of 25 networks with the same configuration and asserted their performance using  
415 common metrics (see section Performance Metrics, Supplementary Fig. 7d). To control for the ability of  $h_d$   
416 to robustly detect the reorganization of the F-actin patterns in dendrites, we compared the proportions of  
417 rings and fibers predicted by the FCN  $h_d$  or labeled by an expert. Supplementary Fig. 7c shows no significant  
418 difference between expert and FCN labeling for both low and high neuronal activity conditions, indicating  
419 that the deep learning approach can reliably detect different proportions of F-actin rings and fibers in  
420 neurons. We also performed a dimensionality reduction on the embedded central layer of the FCN  $h_d$  using  
421 the non-linear approach Uniform Manifold Approximation and Projection (UMAP) [41]. Supplementary  
422 Fig. 15 shows a clear separation in this reduced space between crops containing rings and fibers.

423 The  $h_a$  network was designed to detect the presence of the axonal F-actin rings. The resolution steps  
424 were the same as for  $h_d$ , but the layer size were of {8, 16, 32, 64} filters respectively (Supplementary Fig. 6a).  
425 The layers in the expanding path are symmetrical to the contracting path. The Adam optimizer was used  
426 with similar parameters as  $h_d$ , with early stopping used here as well. Batch size was set at 96. Cross  
427 entropy was used as a loss function. The binary segmentation map was obtained using a hard threshold  
428 of 0.02 on the prediction of the network. This threshold was calculated using the same ROC procedure  
429 as for the  $h_d$  (Supplementary Fig. 6c). We evaluated the metrics on the testing dataset to obtain the  
430 performance of the network in generalization (Supplementary Fig. 6d). Examples of predictions from the  
431 testing dataset compared to the labels of the expert and the confusion matrix demonstrate the performance  
432 of  $h_a$  (Supplementary Fig. 6e, f).

433 To control for the sensitivity of  $h_a$  to detect changes of the axonal F-actin pattern, we tested its capacity to  
434 detect the disruption of the periodical lattice on a sample treated with Latrunculin A (Lat A). Supplementary  
435 Fig. 16 shows that the deep learning approach can successfully identify an significant reduction of the detected  
436 axonal F-actin rings on the Lat A treated cells (Supplementary Fig. 16, 5 neurons, one-sided ANOVA,  
437  $p = 0.049$ ).

## 438 Weak Labels

439 Due to the time consuming and difficult task related to precise segmentation of numerous super-resolution  
440 microscopy images, we formulated the segmentation problem as a weakly supervised learning approach,  
441 where the network is trained on coarse labels that are faster and easier to produce. Our results demonstrate  
442 the ability of the network to go beyond the training labels and exceed the accuracy of the bounding boxes  
443 (B). In other words, the network is able to infer precise segmentation rules using only coarse examples. To  
444 assess the improvement in segmentation performance, we asked the expert to take the time to precisely label  
445 (P) 70 regions (38 for rings and 32 for fibers) randomly sampled from the testing dataset. We then compared  
446 the precision-recall curve (PR), an analysis method that is insensitive to class imbalance (e.g. number of  
447 background pixels in our images being more important than the number of foreground pixels) (Fig. 5b).  
448 The comparison of the predicted segmentation (S) and B with P as ground truths demonstrated how S  
449 exhibits a higher precision over all range of recall than B, showing that the prediction of  $h_d$  is closer to P  
450 than B (Fig. 5b and Supplementary Fig. 9d). This asserts that the trained FCN generated more accurate  
451 segmentation than the labels it was trained with. If the network had not gone further than the bounding  
452 box labels, its performance on precise labels would have been at most the performance of B on P.

453 We also set out to analyse how coarse labels can impact on the precision of the predictions. To do so, we  
454 trained 5 different instances of networks for different stepwise dilation of the labels (from 100 nm to 1  $\mu$ m,  
455 Fig. 9c,d). Following training, the thresholds for the prediction of rings and fibers were calculated using the

456 ROC procedure described in the Fully Convolutional Neural Network Methods section. The precise dataset  
457 was then used with all instances of network to calculate the average precision score (AP) with the precise  
458 labels as ground truth (Fig. 5d, Supplementary Fig. 9d).

## 459 Resampling

460 For bivariate data analysis two resampling methods were employed : 1) bootstrapping [42] for data visu-  
461 alization and 2) randomization test (shuffling) for statistical analysis [43]. The bootstrapping experiments  
462 consisted in sampling the data points for each condition with replacement to generate an estimate of the  
463 mean values distribution. For each condition (N data points per condition), a bootstrap sample consisted  
464 of randomly selecting N data points with replacement from the raw data and calculating the mean value  
465 of the distribution. The number of repetitions was set to 10 000 for all conditions. It resulted in a distri-  
466 bution of the bootstrapped mean values that could be used for data visualization (Fig. 6c and 7a,c). For  
467 the comparison between two different stimulation conditions, statistical analysis was performed using a ran-  
468 domization test. The null hypothesis for each set of two conditions (A and B) was that both conditions  
469 belonged to the same distribution. First, the difference between the mean values of A and B was calculated  
470 ( $D_{raw} = \mu_A - \mu_B$ ). Data points from both conditions were randomly reassigned to two groups A' and B'  
471 having  $N_A$  and  $N_B$  data points respectively. The difference between the mean values of A' and B' was  
472 determined ( $D_{rand} = \mu_{A'} - \mu_{B'}$ ). The difference of mean values obtained from the raw data ( $D_{raw}$ ) was  
473 compared to the distribution of the differences obtained from 10 000 randomization samples ( $D_{rand}$ ) to verify  
474 the null hypothesis, assuming multivariate normal distribution of randomization samples.

## 475 Performance Metrics

476 We define common pixel-wise metrics that were used to evaluate the performance of the architectures [44].  
477 The first metric is the F1-score and measures the overlap between the segmentation map and the ground  
478 truth. The F1-score is defined as

$$479 \text{F1} = \frac{2\text{TP}}{\text{FP} + 2\text{TP} + \text{FN}}, \quad (1)$$

480 where TP, FP and FN are true-positive, false-positive and false-negative respectively. The second metric  
481 calculates the proportion of the ground truth also present in the predicted segmentation. It is called the  
482 sensitivity and is defined as

$$483 \text{sensitivity} = \frac{\text{TP}}{\text{TP} + \text{FN}}. \quad (2)$$

484 The specificity measures the proportion of background also predicted as background in the segmentation  
485 map. It is defined as

$$486 \text{specificity} = \frac{\text{TN}}{\text{TN} + \text{FP}}, \quad (3)$$

487 where TN stands for true-negative. Precision, which measures the proportion of true features over all the  
488 true prediction, is defined as

$$489 \text{precision} = \frac{\text{TP}}{\text{TP} + \text{FP}}. \quad (4)$$

## 486 Analysis of axonal and dendritic branch lengths

487 For the morphological analysis of the dendritic and axonal processes we used two measurements that were  
488 performed on each image : i) total length of analysed branches and ii) maximal length of a branch. Briefly,  
489 we generated a skeleton image from the binary masks used to identify dendrites and axons. We extracted  
490 all nodes, *i.e.* a joint or an end point, from the skeleton image. The skeleton was subdivided in multiple  
491 segments, where each segment has a start and an end node. The total length of branches per image was  
492 calculated using the sum of each segment length in the skeleton image. To calculate the maximal branch  
493 length per image, we used the `NetworkX` python library to efficiently create and manipulate a complex  
494 network. The complex network (or graph) was created from an adjacency matrix. The weights of the

495 adjacency matrix were set according to the length of the segment between two connected nodes. The weight  
496 is set to 0 if two nodes are not connected by a segment.

$$\text{adjacency matrix} := \begin{array}{c|cccc} & n_1 & n_2 & \dots & n_n \\ \hline n_1 & 0 & \overline{n_1 n_2} & \dots & \overline{n_1 n_n} \\ n_2 & \overline{n_2 n_1} & 0 & \dots & \overline{n_2 n_n} \\ \dots & \dots & \dots & \dots & \dots \\ n_n & \overline{n_n n_1} & \overline{n_n n_2} & \dots & 0 \end{array} \quad (5)$$

497 The  $\overline{n_1 n_2}$  notation represents the length of the segment between nodes  $n_1$  and  $n_2$ . While we could have  
498 reported the maximal branch length (multiple connected segments) in the graph, we found that in some cases  
499 it produced branches that were not representative of the analysed neuronal processes. For this reason, we  
500 extracted the shortest path between the two most distant and connected nodes in the graph. This method  
501 provided more linear branches and allowed us to report the maximal length of a branch for each image.

## 502 Data and code availability

503 The datasets for the training of both networks and the dataset for the analysis are available from the  
504 corresponding author upon request.

505 Open source code for the segmentation of the periodical lattice in dendrite and axon is available online :  
506 <https://github.com/FLCLab/STEDActinFCN>.

## 507 Acknowledgments

508 Laurence Emond for sample preparation and immunocytochemistry. Francine Nault, Charleen Salesse and  
509 Laurence Emond for the neuronal cell culture. Jonathan Marek and Renaud Bernatchez for the development  
510 of a custom Python annotation application. Vincent Poiré and Azadeh Sadat Mozafari for preliminary  
511 experiments with U-Net implementation and Gabriel Leclerc for assistance with the skeleton analysis. Armen  
512 Saghatelian for comments on the manuscript. Funding was provided by grants from the Natural Science  
513 and Engineering Research Council of Canada (P.D.K., C.G.), the Canadian Institute of Health Research  
514 (P.D.K.), MITACS (C.G.), and the Canadian Foundation for Innovation (P.D.K.).

## 515 Author Contributions

516 F.L.C., M.L. and G.L. performed STED imaging, T.W, F.L.C. and G.L. performed live-cell STED imaging,  
517 F.L.C., M.L., G.L. and T.W. prepared samples, F.L.C. generated the labeled datasets, A.B., M.A.G. and  
518 C.G. designed the FCN, A.B. implemented the FCN based analysis, F.L.C., A.B. and M.A.G. analyzed  
519 the results, F.L.C., M.L. and P.D.K. designed the experiments, F.L.C., M.L., A.B. and P.D.K. wrote the  
520 manuscript, F.L.C., C.G. and P.D.K. supervised the project.

## 521 Additional Information

522 The authors declare no financial and non-financial competing interests.

## References

- 523
- 524 [1] Xu, K., Zhong, G. & Zhuang, X. Actin, spectrin, and associated proteins form a periodic cytoskeletal  
525 structure in axons. *Science* **339**, 452–456 (2013).
- 526 [2] D’Este, E., Kamin, D., Göttfert, F., El-Hady, A. & Hell, S. W. STED nanoscopy reveals the ubiquity  
527 of subcortical cytoskeleton periodicity in living neurons. *Cell Reports* **10**, 1246–1251 (2015).
- 528 [3] Zhong, G. *et al.* Developmental mechanism of the periodic membrane skeleton in axons. *eLife* **3**, e04581  
529 (2014).
- 530 [4] Han, B., Zhou, R., Xia, C. & Zhuang, X. Structural organization of the actin-spectrin-based membrane  
531 skeleton in dendrites and soma of neurons. *Proceedings of the National Academy of Sciences* **114**,  
532 E6678–E6685 (2017).
- 533 [5] Ganguly, A. *et al.* A dynamic formin-dependent deep F-actin network in axons. *Journal of Cell Biology*  
534 **210**, 401–417 (2015).
- 535 [6] Konietzny, A., Bär, J. & Mikhaylova, M. Dendritic actin cytoskeleton: structure, functions, and regu-  
536 lations. *Frontiers in Cellular Neuroscience* **11**, 147 (2017).
- 537 [7] Schätzle, P. *et al.* Activity-dependent actin remodeling at the base of dendritic spines promotes micro-  
538 tubule entry. *Current Biology* **28**, 2081–2093 (2018).
- 539 [8] Bär, J., Kobler, O., Van Bommel, B. & Mikhaylova, M. Periodic F-actin structures shape the neck of  
540 dendritic spines. *Scientific Reports* **6**, 37136 (2016).
- 541 [9] Unsain, N. *et al.* Remodeling of the actin/spectrin membrane-associated periodic skeleton, growth cone  
542 collapse and F-actin decrease during axonal degeneration. *Scientific Reports* **8**, 3007 (2018).
- 543 [10] Wang, G. *et al.* Structural plasticity of actin-spectrin membrane skeleton and functional role of actin  
544 and spectrin in axon degeneration. *eLife* **8**, e38730 (2019).
- 545 [11] Zhou, R., Han, B., Xia, C. & Zhuang, X. Membrane-associated periodic skeleton is a signaling platform  
546 for rtk transactivation in neurons. *Science* **365**, 929–934 (2019).
- 547 [12] Sidenstein, S. C. *et al.* Multicolour multilevel STED nanoscopy of actin/spectrin organization at  
548 synapses. *Scientific Reports* **6**, 26725 (2016).
- 549 [13] Basu, S. & Lamprecht, R. The role of actin cytoskeleton in dendritic spines in the maintenance of  
550 long-term memory. *Frontiers in Molecular Neuroscience* **11**, 143 (2018).
- 551 [14] Chazeau, A. & Giannone, G. Organization and dynamics of the actin cytoskeleton during dendritic  
552 spine morphological remodeling. *Cellular and Molecular Life Sciences* **73**, 3053–3073 (2016).
- 553 [15] Ronneberger, O., Fischer, P. & Brox, T. U-net: Convolutional networks for biomedical image segmen-  
554 tation. In *International Conference on Medical image computing and computer-assisted intervention*,  
555 234–241 (Springer, 2015).
- 556 [16] Van Valen, D. A. *et al.* Deep learning automates the quantitative analysis of individual cells in live-cell  
557 imaging experiments. *PLoS Computational Biology* **12**, e1005177 (2016).
- 558 [17] Sadanandan, S. K., Ranefall, P., Le Guyader, S. & Wählby, C. Automated training of deep convolutional  
559 neural networks for cell segmentation. *Scientific Reports* **7**, 7860 (2017).
- 560 [18] Raza, S. E. A. *et al.* MIMO-net: A multi-input multi-output convolutional neural network for cell segmen-  
561 tation in fluorescence microscopy images. In *2017 IEEE 14th International Symposium on Biomedical  
562 Imaging (ISBI 2017)*, 337–340 (IEEE, 2017).
- 563 [19] Falk, T. *et al.* U-net: deep learning for cell counting, detection, and morphometry. *Nature methods* **16**,  
564 67 (2019).

- 565 [20] Papandreou, G., Chen, L.-C., Murphy, K. P. & Yuille, A. L. Weakly- and semi-supervised learning of a  
566 deep convolutional network for semantic image segmentation. In *Proceedings of the IEEE International  
567 Conference on Computer Vision*, 1742–1750 (2015).
- 568 [21] Akram, S. U., Kannala, J., Eklund, L. & Heikkilä, J. Cell segmentation proposal network for microscopy  
569 image analysis. In *Deep Learning and Data Labeling for Medical Applications*, 21–29 (Springer, 2016).
- 570 [22] Kraus, O. Z., Ba, J. L. & Frey, B. J. Classifying and segmenting microscopy images with deep multiple  
571 instance learning. *Bioinformatics* **32**, i52–i59 (2016).
- 572 [23] De Koninck, P., Carbonetto, S. & Cooper, E. Ngf induces neonatal rat sensory neurons to extend  
573 dendrites in culture after removal of satellite cells. *Journal of Neuroscience* **13**, 577–585 (1993).
- 574 [24] Urban, N. T., Willig, K. I., Hell, S. W. & Nägerl, U. V. Sted nanoscopy of actin dynamics in synapses  
575 deep inside living brain slices. *Biophysical journal* **101**, 1277–1284 (2011).
- 576 [25] Frost, N. A., Shroff, H., Kong, H., Betzig, E. & Blanpied, T. A. Single-molecule discrimination of  
577 discrete perisynaptic and distributed sites of actin filament assembly within dendritic spines. *Neuron*  
578 **67**, 86–99 (2010).
- 579 [26] Wegner, W. *et al.* In vivo mouse and live cell sted microscopy of neuronal actin plasticity using far-red  
580 emitting fluorescent proteins. *Scientific reports* **7**, 11781 (2017).
- 581 [27] Bubb, M. R., Spector, I., Beyer, B. B. & Fosen, K. M. Effects of jasplakinolide on the kinetics of actin  
582 polymerization: an explanation for certain in vivo observations. *Journal of Biological Chemistry* **275**,  
583 5163–5170 (2000).
- 584 [28] Lukinavičius, G. *et al.* Fluorogenic probes for live-cell imaging of the cytoskeleton. *Nature Methods* **11**,  
585 731 (2014).
- 586 [29] Mortal, S. *et al.* Actin waves do not boost neurite outgrowth in the early stages of neuron maturation.  
587 *Frontiers in Cellular Neuroscience* **11**, 402 (2017).
- 588 [30] Lu, W.-Y. *et al.* Activation of synaptic nmda receptors induces membrane insertion of new ampa  
589 receptors and ltp in cultured hippocampal neurons. *Neuron* **29**, 243–254 (2001).
- 590 [31] Hudmon, A. *et al.* A mechanism for Ca<sup>2+</sup>/calmodulin-dependent protein kinase II clustering at synaptic  
591 and nonsynaptic sites based on self-association. *Journal of Neuroscience* **25**, 6971–6983 (2005).
- 592 [32] Vohs, K. D. *et al.* Making choices impairs subsequent self-control: A limited-resource account of decision  
593 making, self-regulation, and active initiative. *Journal of Personality and Social Psychology* **94**, 883–898  
594 (2008).
- 595 [33] Umemiya, M., Senda, M. & Murphy, T. H. Behaviour of NMDA and AMPA receptor-mediated miniature  
596 EPSCs at rat cortical neuron synapses identified by calcium imaging. *The Journal of Physiology* **521**,  
597 113–122 (1999).
- 598 [34] Pollard, T. D. & Cooper, J. A. Actin and actin-binding proteins. a critical evaluation of mechanisms  
599 and functions. *Annual Review of Biochemistry* **55**, 987–1035 (1986).
- 600 [35] Lynch, G. & Baudry, M. Brain spectrin, calpain and long-term changes in synaptic efficacy. *Brain  
601 Research Bulletin* **18**, 809–815 (1987).
- 602 [36] Albrecht, D. *et al.* Nanoscopic compartmentalization of membrane protein motion at the axon initial  
603 segment. *Journal of Cell Biology* 37–46 (2016).
- 604 [37] Wang, Z. *et al.* Myosin Vb mobilizes recycling endosomes and ampa receptors for postsynaptic plasticity.  
605 *Cell* **135**, 535–548 (2008).
- 606 [38] Durand, A. *et al.* A machine learning approach for online automated optimization of super-resolution  
607 optical microscopy. *Nature communications* **9** (2018).

- 608 [39] Schindelin, J. *et al.* Fiji: an open-source platform for biological-image analysis. *Nature methods* **9**,  
609 676–682 (2012).
- 610 [40] Otsu, N. A threshold selection method from gray-level histograms. *IEEE Transactions on Systems,*  
611 *Man, and Cybernetics* **9**, 62–66 (1979).
- 612 [41] McInnes, L. & Healy, J. Umap: Uniform manifold approximation and projection for dimension reduc-  
613 tion. *arXiv preprint arXiv:1802.03426* (2018).
- 614 [42] Efron, B. & Tibshirani, R. J. *An introduction to the bootstrap* (CRC press, 1994).
- 615 [43] Good, P. I. *Resampling Methods* (Birkhäuser Basel, 2006), 3 edn.
- 616 [44] Yeghiazaryan, V. & Voiculescu, I. An overview of current evaluation methods used in medical image  
617 segmentation. *Department of Computer Science, University of Oxford* (2015).

## 618 Figure Legends

619 **Figure 1.** STED nanoscopy reveals diverse nanostructures of F-actin, in cultured hippocampal neuronal  
620 processes, that cannot be resolved with confocal microscopy. a) Representative image of the F-actin skeleton  
621 showing the diversity of nanostructures that can be observed with STED nanoscopy. Arrows point to regions  
622 exhibiting dendritic rings (green), axonal rings (orange), longitudinal fibers (magenta), compact assemblies  
623 (cyan), or undefined or diffuse signal (yellow). Orange arrowheads indicate regions of overlapping axonal  
624 and dendritic patterns. b) Three color imaging of the region in a) showing the overlap between axons (cyan,  
625 phosphorylated neurofilaments - SMI31) and dendrites (yellow, MAP2). MAP2 and SMI31 were imaged  
626 with confocal resolution to highlight the shape of the processes. c) Insets show a magnification of the regions  
627 indicated with the dashed squares in a) for both STED (top) and confocal (bottom) imaging modalities.  
628 Scale bar  $2 \mu\text{m}$ , insets  $3.2 \times 3.2 \mu\text{m}$ .

629 **Figure 2.** Nanoscale activity-dependent remodelling of F-actin revealed by STED nanoscopy. Three color  
630 imaging of F-actin (STED, white), phosphorylated neurofilaments (confocal, cyan) and MAP2 (confocal,  
631 yellow) was performed to identify F-actin nanostructures in dendrites (yellow) and axons (cyan). STED  
632 imaging shows that the prevalence of dendritic rings (green arrows) and longitudinal fibers (magenta ar-  
633 rows) is modulated by neuronal activity, while axonal rings (orange arrows) are observed regardless of the  
634 activity level. Shown are example images for a) the activity-reducing stimuli high  $\text{Mg}^{2+}$ /low  $\text{Ca}^{2+}$  and the  
635 three activity-promoting stimuli b)  $0\text{Mg}^{2+}$ /glycine/bicuculline ( $0\text{Mg}^{2+}$ /Gly/Bic), c) high  $\text{K}^+$ , and d) gluta-  
636 mate/glycine (Glu/Gly). Insets (right) show a magnification of the regions identified with a white rectangle  
637 on the left STED images. Scale bar left:  $2 \mu\text{m}$ , insets:  $1 \mu\text{m}$ .

638 **Figure 3.** Two-color STED nanoscopy of F-actin and  $\beta\text{II}$ -spectrin in dendrites. (a) Low-activity high  
639  $\text{Mg}^{2+}$ /low  $\text{Ca}^{2+}$  condition and b) Glutamate/Glycine neuronal stimulation. (a) *Top-Left* and (b) *Left*: Over-  
640 lay of two-color STED nanoscopy of F-actin (green) and  $\beta\text{II}$ -spectrin (red) with confocal imaging of MAP2  
641 (blue) to identify the dendrites. Insets show the magnified regions identified in the full single-color STED  
642 images of F-actin and  $\beta\text{II}$ -spectrin. Arrows indicate the detected F-actin and  $\beta\text{II}$ -spectrin patterns : den-  
643 dritic rings (green), axonal rings (orange), and longitudinal fibers (magenta). Scale bars (a, b)  $2 \mu\text{m}$ , insets  
644  $1 \mu\text{m}$ .

645 **Figure 4.** Segmentation of F-actin rings and longitudinal fibers using a fully convolutional neural network.  
646 a) Architecture of the fully convolutional network (FCN) ( $h_d$ ), which is a modified 2D U-Net.  $h_d$  is trained  
647 with images labeled for F-actin rings (green) and fibers (magenta). It generates scores between 0 and 1 for  
648 each pixel to create prediction maps for both structures. Independent thresholds are applied for rings (0.25)  
649 and fibers (0.4) to obtain two segmentation maps (see Materials and Methods and Supplementary Fig. 7).  
650 b) Comparison between the labeling of an expert (middle) and the corresponding FCN segmented image  
651 (right) on a representative image from the testing dataset. MAP2 (yellow) and phosphorylated neurofila-  
652 ments (cyan) immunostaining and corresponding confocal images are used to identify dendrites and axons,  
653 respectively. Quantification of F-actin rings and fibers was performed within a dendritic mask generated  
654 from the MAP2 channel (white line, right). c) Representative input image analyzed with the FCN. The  
655 segmented area for F-actin rings (green) and fibers (magenta) is calculated inside the dendritic mask (white  
656 line) (right image) for each image. Scale bars (a, b)  $1 \mu\text{m}$ , (c)  $2 \mu\text{m}$ .

657 **Figure 5.** Performance evaluation of the FCN  $h_d$  in the context of weakly supervised learning and labeling  
658 errors. a) Comparison between manual bounding box (left), precise contour (middle) and FCN predicted  
659 (right) labeling of the dendritic F-actin ring pattern. b) Precision-recall curves for F-actin rings (green) and  
660 longitudinal fibers (magenta). The area under the curve, or average precision (AP), was calculated for both  
661 patterns. The network achieved a AP score of 0.53 and 0.67 for F-actin rings and fibers respectively compared  
662 to 0.38 and 0.5 for the manual bounding box labeling (using the precise contour labeling as the ground truth).  
663 The higher performance observed for the predictions compared to the bounding box labeling shows that the  
664 network is able to infer precise segmentation rules using only coarse examples. c) Generation of a training  
665 dataset to characterize the impact of coarse labeling on the precision of  $h_d$  by stepwise dilation (original

666 labels - blue, 100 nm - orange, 240 nm - green, 500 nm - red, 1  $\mu\text{m}$  - violet) of the training labels for F-actin  
667 rings (left) and fibers (right). d) The AP scores were calculated for 5 different instances of the network for  
668 each dilation step. For F-actin fibers (right) dilation up to 1  $\mu\text{m}$  still resulted in network predictions with  
669 significantly higher precision than manual bounding box labeling (post-hoc t-test,  $p_{\text{original}} = 1.8210 \times 10^{-6}$ ,  
670  $p_{100\text{nm}} = 2.4291 \times 10^{-7}$ ,  $p_{240\text{nm}} = 1.8530 \times 10^{-5}$ ,  $p_{500\text{nm}} = 2.7931 \times 10^{-4}$ ,  $p_{1\mu\text{m}} = 9.7314 \times 10^{-3}$ ). For the  
671 F-actin ring patterns, a dilation of 1  $\mu\text{m}$  led to comparable AP than the expert labeling (post-hoc t-test,  
672  $p_{1\mu\text{m}} = 0.3309$ ), while smaller dilation steps led to significantly higher AP scores compared to bounding  
673 box labeling (post-hoc t-test,  $p_{\text{original}} = 1.9383 \times 10^{-5}$ ,  $p_{100\text{nm}} = 4.1884 \times 10^{-5}$ ,  $p_{240\text{nm}} = 2.2539 \times 10^{-7}$ ,  
674  $p_{500\text{nm}} = 2.3219 \times 10^{-4}$ ). Black lines represent the 95% confidence interval calculated from the t-statistics  
675 distribution. Scale bars 1  $\mu\text{m}$ .

676 **Figure 6.** Increasing neuronal activity induces the reorganization of F-actin rings into longitudinal fibers  
677 in dendrites but not in axons. a) Representative images of the periodical F-actin rings in axons of neurons  
678 exposed to 4 different treatments modulating neuronal activity. The area of F-actin rings segmented by the  
679 FCN  $h_a$  is shown in green. b) The detected area for axonal rings in 13 DIV neurons remains unchanged  
680 upon stimulation (one-sided ANOVA,  $p = 0.2525$ , numbers above each boxes indicate the number of neurons  
681 from 4 independent cultures). c) Representative images of the periodical F-actin lattice and the longitudinal  
682 fibers in dendrites of 13 DIV neurons for four different treatments modulating neuronal activity : *Top* STED  
683 Images of F-actin stained with Phalloidin-STAR635 overlaid with the confocal images of the dendritic  
684 (MAP2, yellow) and axonal (phosphorylated neurofilaments, cyan) makers. *Bottom*: Predictions of the FCN  
685 for F-actin rings (green) and fibers (magenta) inside the dendritic mask (white line).d) Bivariate kernel  
686 density estimate of the raw data (grey cross) for 8 DIV and 13 DIV neurons treated with i) high  $\text{Mg}^{2+}$ /low  
687  $\text{Ca}^{2+}$  for 10 min (blue), ii)  $0\text{Mg}^{2+}/\text{Gly}/\text{Bic}$  for 10 min (green), iii) high  $\text{K}^+$  for 2 min (orange) and iv)  
688  $\text{Glu}/\text{Gly}$  for 2 min (violet). e) Mean distributions using bootstrapping. The formation of F-actin fibers is  
689 enhanced for 13 DIV neurons compared to 8 DIV neurons for the synaptic stimulation  $0\text{Mg}^{2+}/\text{Gly}/\text{Bic}$  or  
690  $\text{Glu}/\text{Gly}$ , but not for high  $\text{K}^+$  stimulations. Shown are the regions comprising 95%, 99% and 99.9% of the  
691 data point distribution. Scale bars 1  $\mu\text{m}$ . d,e) Number of independent cultures (N) : high  $\text{Mg}^{2+}$ /low  $\text{Ca}^{2+}$   
692  $N_{8\text{DIV}} = 6, N_{13\text{DIV}} = 9$ ;  $0\text{Mg}^{2+}/\text{Gly}/\text{Bic}$   $N_{8\text{DIV}} = 4, N_{13\text{DIV}} = 8$ ; high  $\text{K}^+$   $N_{8\text{DIV}} = 6, N_{13\text{DIV}} = 9$ ;  $\text{Glu}/\text{Gly}$   
693  $N_{8\text{DIV}} = 5, N_{13\text{DIV}} = 6$ . Note that the detected areas for dendrite and axons cannot be compared since  
694 the detection of F-actin rings was performed with two different FCNs and using different foreground masks.  
695 Only a comparison between the stimulation conditions for each experiment (dendrites or axons) is possible.  
696 Scale bars 1  $\mu\text{m}$ .

697 **Figure 7.** Synaptic NMDAR activity and  $\text{Ca}^{2+}$  influx can drive a reversible dendritic F-actin reorganization  
698 from a ring to fiber pattern. a) Mean distributions of dendritic F-actin rings and fibers using bootstrap-  
699 ping for synaptic stimulation ( $0\text{Mg}^{2+}/\text{Gly}/\text{Bic}$  for 10 min) without (green) or with TTX (violet) or APV  
700 (red) compared with the low activity high  $\text{Mg}^{2+}$ /low  $\text{Ca}^{2+}$  condition (blue). b) Density distribution of the  
701 raw data. TTX (1  $\mu\text{M}$ ) partially but significantly blocks the F-actin remodeling caused by  $0\text{Mg}^{2+}/\text{Gly}/\text{Bic}$   
702 stimulation, while APV (25  $\mu\text{M}$ ) blocks it further ( $p = 1.4 \times 10^{-3}$  and  $p = 2.5 \times 10^{-5}$  respectively). c) Rep-  
703 resentative images of neurons treated with  $0\text{Mg}^{2+}/\text{Gly}/\text{Bic}$  with (left) and without (right) APV segmented  
704 with our deep learning based approach. d) Mean distributions of dendritic F-actin rings and fibers using  
705 bootstrapping for 2 min high  $\text{K}^+$  stimulation (1.2 mM  $\text{Ca}^{2+}$ , orange) or with 2.4 mM  $\text{Ca}^{2+}$  (violet) or with  
706 1.2 mM  $\text{Ca}^{2+}$  and 50  $\mu\text{M}$   $\text{Cd}^{2+}$  (pink). The red circles indicate the same high  $\text{K}^+$  stimulation (1.2 mM  $\text{Ca}^{2+}$ )  
707 condition followed by 15 min wash in high  $\text{Mg}^{2+}$ /low  $\text{Ca}^{2+}$ . The F-actin remodeling is  $\text{Ca}^{2+}$ -dependent and  
708 reversible, at least partially within 15 min. e) Density distribution of the raw data. f) Representative images  
709 of neurons treated with high  $\text{K}^+$  stimuli with (left) and without (right)  $\text{Cd}^{2+}$  segmented with our deep learn-  
710 ing based approach. Statistical analysis performed with a randomization test (see Materials and Methods).  
711 Scale bars 1 $\mu\text{m}$ . Number of independent cultures (N) and number of neurons (n): high  $\text{Mg}^{2+}$ /low  $\text{Ca}^{2+}$   
712  $N = 9, n = 86$ ,  $0\text{Mg}^{2+}/\text{Gly}/\text{Bic}$   $N = 8, n = 70$ ;  $0\text{Mg}^{2+}/\text{Gly}/\text{Bic}$  1 $\mu\text{M}$  TTX  $N = 2, n = 20$ ;  $0\text{Mg}^{2+}/\text{Gly}/\text{Bic}$   
713 + 25 $\mu\text{M}$  APV  $N = 2, n = 20$ ; high  $\text{Mg}^{2+}$ /low  $\text{Ca}^{2+}$   $N = 9$ ; high  $\text{K}^+$ /1.2 mM  $\text{Ca}^{2+}$   $N = 9, n = 83$ ; high  
714  $\text{K}^+$ /2.4 mM  $\text{Ca}^{2+}$   $N = 2, n = 20$ ; high  $\text{K}^+$ /50  $\mu\text{M}$   $\text{Cd}^{2+}$   $N = 2, n = 22$ ; high  $\text{K}^+$ /15 min wash high  $\text{Mg}^{2+}$   
715  $N = 3, n = 32$ .



716 **Figure 8.** Schematic representation of the nanoscale patterns of F-actin cytoskeleton in an axon and  
717 dendrites of a neuron undergoing variable level of neuronal activity; the periodical lattice reorganizes into  
718 longitudinal fibers in dendrites, but not in the axon, with increasing neuronal/ $\text{Ca}^{2+}$  activity.
